# Supplementary material for: Hughes Abdominal Repair Trial (HART)—abdominal wall closure techniques to reduce the incidence of incisional hernias: feasibility trial for a multicentre, pragmatic, randomised controlled trial
Source: PubMed Central journal article supplement (PMC5778308; doi:10.1136/bmjopen-2017-017235), 2017-12-19
Supplement: bmjopen-2017-017235.draft_revisions.pdf [file bmjopen-2017-017235.draft_revisions.pdf]

# BMJ Open

BMJ Open is committed to open peer review. As part of this commitment we make the peer review history of every article we publish publicly available.

When an article is published we post the peer reviewers' comments and the authors' responses online. We also post the versions of the paper that were used during peer review. These are the versions that the peer review comments apply to.

The versions of the paper that follow are the versions that were submitted during the peer review process. They are not the versions of record or the final published versions. They should not be cited or distributed as the published version of this manuscript.

BMJ Open is an open access journal and the full, final, typeset and author-corrected version of record of the manuscript is available on our site with no access controls, subscription charges or pay-per-view fees (<http://bmjopen.bmj.com>).

If you have any questions on BMJ Open's open peer review process please email [editorial.bmjopen@bmj.com](mailto:editorial.bmjopen@bmj.com)

# BMJ Open

## Hughes Abdominal Repair Trial (HART) - Abdominal wall closure techniques to reduce the incidence of incisional hernias: Feasibility study for a multi-centre pragmatic randomised controlled trial

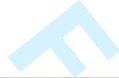

|                                 |                                                                                                                                                                                                                                                                                                                                                                                                                                                                                                                                                                                                                                                                                                                                                                                                                                                                                                                                                                                                                                                                                                                                                                                                                                                                                                                                                                                                                                                                                                                                                                                                                                                                                                                                                                                                                                                                |
|---------------------------------|----------------------------------------------------------------------------------------------------------------------------------------------------------------------------------------------------------------------------------------------------------------------------------------------------------------------------------------------------------------------------------------------------------------------------------------------------------------------------------------------------------------------------------------------------------------------------------------------------------------------------------------------------------------------------------------------------------------------------------------------------------------------------------------------------------------------------------------------------------------------------------------------------------------------------------------------------------------------------------------------------------------------------------------------------------------------------------------------------------------------------------------------------------------------------------------------------------------------------------------------------------------------------------------------------------------------------------------------------------------------------------------------------------------------------------------------------------------------------------------------------------------------------------------------------------------------------------------------------------------------------------------------------------------------------------------------------------------------------------------------------------------------------------------------------------------------------------------------------------------|
| Journal:                        | <i>BMJ Open</i>                                                                                                                                                                                                                                                                                                                                                                                                                                                                                                                                                                                                                                                                                                                                                                                                                                                                                                                                                                                                                                                                                                                                                                                                                                                                                                                                                                                                                                                                                                                                                                                                                                                                                                                                                                                                                                                |
| Manuscript ID                   | bmjopen-2017-017235                                                                                                                                                                                                                                                                                                                                                                                                                                                                                                                                                                                                                                                                                                                                                                                                                                                                                                                                                                                                                                                                                                                                                                                                                                                                                                                                                                                                                                                                                                                                                                                                                                                                                                                                                                                                                                            |
| Article Type:                   | Research                                                                                                                                                                                                                                                                                                                                                                                                                                                                                                                                                                                                                                                                                                                                                                                                                                                                                                                                                                                                                                                                                                                                                                                                                                                                                                                                                                                                                                                                                                                                                                                                                                                                                                                                                                                                                                                       |
| Date Submitted by the Author:   | 11-Apr-2017                                                                                                                                                                                                                                                                                                                                                                                                                                                                                                                                                                                                                                                                                                                                                                                                                                                                                                                                                                                                                                                                                                                                                                                                                                                                                                                                                                                                                                                                                                                                                                                                                                                                                                                                                                                                                                                    |
| Complete List of Authors:       | <p>Harries, Rhiannon; University Hospital of Wales, Department of Colorectal Surgery; Welsh Barbers Research Group<br/>         Cornish, Julie; Welsh Barbers Research Group; Royal Glamorgan Hospital, Department of Colorectal Surgery<br/>         Bosanquet, David; University Hospital of Wales, Department of Colorectal Surgery; Welsh Barbers Research Group<br/>         Rees, Buddug; University Hospital of Wales, Department of Colorectal Surgery<br/>         Ansell, James; University Hospital of Wales, Department of Colorectal Surgery; Welsh Barbers Research Group<br/>         Frewern, Natasha; University Hospital of Wales, Department of Colorectal Surgery; Welsh Barbers Research Group<br/>         Dhruva Rao, Pawan; University Hospital of Wales, Department of Colorectal Surgery; Welsh Barbers Research Group<br/>         Phillips, Simon; University Hospital of Wales, Department of Colorectal Surgery<br/>         Morris, Chris; University Hospital of Wales, Department of Colorectal Surgery<br/>         Horwood, James; University Hospital of Wales, Department of Colorectal Surgery<br/>         Davies, Mansel Leigh; University Hospital of Wales, Department of Colorectal Surgery<br/>         Davies, Michael ; University Hospital of Wales, Department of Colorectal Surgery<br/>         Hargest, Rachel; University Hospital of Wales, Department of Colorectal Surgery<br/>         Islam, Saiful; Swansea University, Trials Unit<br/>         Bashir, Nadim; Swansea University, Trials Unit<br/>         Watkins, Alan; Swansea University, Trials Unit<br/>         Jones, Sian; Involving People, Health and Care Research Wales<br/>         Russell, Ian; Swansea University, Trials Unit<br/>         Torkington, Jared; University Hospital of Wales, Department of Colorectal Surgery</p> |
| <b>Primary Subject Heading</b>: | Surgery                                                                                                                                                                                                                                                                                                                                                                                                                                                                                                                                                                                                                                                                                                                                                                                                                                                                                                                                                                                                                                                                                                                                                                                                                                                                                                                                                                                                                                                                                                                                                                                                                                                                                                                                                                                                                                                        |
| Secondary Subject Heading:      | Evidence based practice                                                                                                                                                                                                                                                                                                                                                                                                                                                                                                                                                                                                                                                                                                                                                                                                                                                                                                                                                                                                                                                                                                                                                                                                                                                                                                                                                                                                                                                                                                                                                                                                                                                                                                                                                                                                                                        |

1  
2  
3  
4  
5  
6  
7  
8  
9  
10  
11  
12  
13  
14  
15  
16  
17  
18  
19  
20  
21  
22  
23  
24  
25  
26  
27  
28  
29  
30  
31  
32  
33  
34  
35  
36  
37  
38  
39  
40  
41  
42  
43  
44  
45  
46  
47  
48  
49  
50  
51  
52  
53  
54  
55  
56  
57  
58  
59  
60

|           |  |
|-----------|--|
| Keywords: |  |
|           |  |

SCHOLARONE™  
Manuscripts

For peer review only

1  
2  
3 **Hughes Abdominal Repair Trial (HART) - Abdominal wall closure techniques to**  
4 **reduce the incidence of incisional hernias: Feasibility study for a multi-centre**  
5 **pragmatic randomised controlled trial (ISRCTN 25616490)**  
6  
7

8  
9  
10 Harries RL<sup>1,2</sup>, Cornish J<sup>2,3</sup>, Bosanquet D<sup>1,2</sup>, Rees B<sup>1</sup>, Ansell J<sup>1,2</sup>, Frewer N<sup>1,2</sup>, Dhruva Rao P<sup>1,2</sup>,  
11 Phillips SM<sup>1</sup>, Morris C<sup>1</sup>, Horwood J<sup>1</sup>, Davies ML<sup>1</sup>, Davies MM<sup>1</sup>, Hargest R<sup>1</sup>, Islam S<sup>4</sup>, Bashir N<sup>4</sup>,  
12 Watkins A<sup>4</sup>, Jones S<sup>5</sup>, Russell IT<sup>4</sup>, Torkington J<sup>1</sup>; on behalf of the HART Trial Management  
13 Group  
14  
15

16  
17  
18 1 University Hospital of Wales, Cardiff

19 2 Welsh Barbers Research Group

20 3 Royal Glamorgan Hospital, Llantrisant

21 4 Swansea Trials Unit, Swansea University

22 5 Involving People, Health and Care Research Wales  
23  
24  
25

26  
27  
28 **Correspondence should be addressed to:**

29  
30 Prof Jared Torkington, Dep. of Surgery, University Hospital of Wales, Heath Park, Cardiff CF14 4XW  
31 [jared.torkington@wales.nhs.uk](mailto:jared.torkington@wales.nhs.uk) Tel: +44 2920 747747  
32  
33  
34  
35  
36

37 **Word count:** 1892

38  
39  
40 **Article type:** Randomised controlled trial

41  
42  
43 **Running title:** Hughes Abdominal Repair Trial: Feasibility study  
44  
45

46 **Conflict of interest:** None declared  
47  
48

49 **Keywords:** Incisional hernia; Abdominal closure; Hughes repair; Mass closure; randomised  
50 controlled trial; colorectal cancer  
51  
52  
53  
54  
55  
56  
57  
58  
59  
60

## Abstract

**Objectives:** Incisional hernias are common complications of midline abdominal closure. The 'Hughes Repair' combines a standard mass closure with a series of horizontal and two vertical mattress sutures within a single suture. There is evidence to suggest this technique is as effective as mesh repair for the operative management of incisional hernias; however, no trials have compared Hughes Repair with standard mass closure for the prevention of incisional hernia formation. This paper aims to test the feasibility of running a randomised controlled trial of a comparison of abdominal wall closure methods following midline incisional surgery for colorectal cancer.

**Design and Setting:** A feasibility study (with 1:1 randomisation) conducted perioperatively during colorectal cancer surgery.

**Participants:** Patients undergoing midline incisional surgery for resection of colorectal cancer.

**Interventions:** Comparison of two suture techniques (Hughes repair or standard mass closure) for the closure of the midline abdominal wound following surgery for colorectal cancer.

**Primary and Secondary Outcomes:** A 30-patient feasibility study assessed recruitment, randomisation, deliverability and early safety of the surgical techniques used.

**Results:** A total of 30 patients were randomised from 43 patients recruited and consented, over a 5-month period. 14 and 16 patients were randomised to Arm A and B, respectively. There was 1 superficial surgical site infection (SSI) and 2 organ space SSI reported in arm A and 2 superficial SSI and 1 complete wound dehiscence in arm B. There were no suspected unexpected serious adverse reactions reported in either arm. Independent data monitoring committee found no early safety concerns.

**Conclusions:** The feasibility study found no early safety concerns and demonstrated that the trial was acceptable to patients. Progression to the pilot and main phases of the trial has now commenced following approval by the independent data monitoring committee.

**Trial registration:** ISRCTN 25616490

## Strengths and Limitations of this study

- The results of this feasibility study demonstrate that recruitment to a randomised controlled trial comparing suturing techniques in midline incisions following colorectal cancer resection surgery is acceptable to patients with no early safety concerns identified
- This feasibility study is not powered for a definitive study and simply reports the recruitment, deliverability and safety
- We report blinded outcome data and have not included incisional hernia rates in order to prevent the introduction of bias or reduction of equipoise for future recruitment of the main trial

## Introduction

Incisional hernias are common complications of midline abdominal incisions, with a reported incidence of 12.8% at 2 years follow-up [1]. They can result in significant morbidity, impaired quality of life [2] and frequently require emergency surgery. Despite recent development in mesh technology, incisional hernia repair still has disappointingly high recurrence rates (up to 54% in suture repair and up to 36% in mesh repair [3-4]). Prevention of the development of incisional hernia therefore brings significant benefits for both patients and healthcare provision funding.

'Mass closure' remains the standard technique for abdominal closure (closing all layers of the abdominal wall, excluding the skin), with either non-absorbable or slow-resorbing sutures, such as polydioxanone (PDS) [5]. A systematic review and meta-regression of over 14,000 patients found no difference in incisional hernia rate comparing suture material [1]. This poses the question as to whether improved suture technique may reduce incisional hernia formation. The STITCH trial [6], a Dutch multicentre, randomised controlled trial compared small stitch continuous sutures with large stitch standard mass closure in 560 patients. Results demonstrated a reduction in the rate of incisional hernia from 21% in the large bite group to 13% in the small bite group at one-year follow-up. The CONTINT trial, currently still in recruitment, is comparing continuous with interrupted sutures in closing midline incisions after emergency laparotomy [7].

The eponymously titled 'Hughes Repair' (Professor Les Hughes, 1932-2011 [8]), also known as the 'far-and-near' or 'Cardiff Repair' [9] combines a standard mass closure (two loop 1 PDS sutures) with a series of horizontal and two vertical mattress sutures within a single suture (1 Nylon); theoretically distributing the load along the incision length as well as across it (**Figure 1**). The principles are:

1. To ensure, by palpation, that only sound normal tissues are used for the repair
2. To use graduated tension for easy approximation
3. Use a monofilament Nylon suture, which has the advantage of slipping easily through tissues to create a pulley system [10].

1  
2  
3 The Hughes Repair has been shown to have outcomes as effective as the standard mesh repair  
4 in incisional hernia repairs [11]. It is also used for closing abdomens when patients are at high  
5 risk of incisional hernias, after complete abdominal wound dehiscence and laparostomy [12].  
6  
7

8  
9 This feasibility study aimed to establish whether a randomised controlled trial to compare  
10 Hughes Repair with standard mass closure for prevention of midline incisional hernia, in  
11 patients undergoing colorectal cancer resectional surgery, would be deemed acceptable to  
12 patients, achieve adequate recruitment and result in no early safety concerns.  
13  
14  
15  
16  
17  
18  
19  
20  
21  
22  
23  
24  
25  
26  
27  
28  
29  
30  
31  
32  
33  
34  
35  
36  
37  
38  
39  
40  
41  
42  
43  
44  
45  
46  
47  
48  
49  
50  
51  
52  
53  
54  
55  
56  
57  
58  
59  
60



## Methods/Design

### Study Design

The HART trial hypothesis is that the Hughes Repair will reduce the incidence of clinically detected incisional hernia at one year in patients undergoing midline abdominal wall closure incisions following elective or emergency colorectal cancer surgery when compared with standard mass closure **Figure 2**. This is a 1:1 randomised controlled trial comparing two suture techniques for the closure of the midline abdominal wound following surgery for colorectal cancer. The study was approved by the Wales Research Ethics Committee (MREC 12/WA/0374).

### Aims and outcome measures

The feasibility study aimed to assess the ability of the trial to recruit and consent patients over a 5-month period and the deliverability and safety of the Hughes Repair. Operation specific adverse events collected included surgical site infection and full wound dehiscence. Early surgical safety was assessed using post-operative complications, serious adverse event reporting and wound diaries. In this paper we report blinded outcome data and have not included incisional hernia rates in order to prevent the introduction of bias or reduction of equipoise for future recruitment of the main trial.

Independent data monitoring committee reviewed the un-blinded safety data after completion of the feasibility phase. The outcome measures for the full trial have been previously reported [13]; Primary outcome measure being the rate of incisional hernia at 1-year follow-up assessed by clinical examination.

### Eligibility Criteria

Eligibility criteria were assessed at two time points; at initial screening and at point of surgical closure /randomisation. Adult patients (aged 18 year or over), able to give informed consent, undergoing either elective colorectal cancer surgery following full staging investigations including an abdominal CT scan or emergency surgery in those with a strong suspicion of colorectal cancer on abdominal CT scan were eligible at point of initial screening. All patients had to be suitable for either Hughes repair or standard mass closure. At point of surgical

1  
2  
3 closure, eligibility was further assessed, and all patients who had a midline incision (open or  
4 laparoscopic assisted/ converted) of 5cm or more in length were deemed suitable for  
5 randomisation. Patients requiring mesh insertion or having an abdominal musculofascial flap  
6 for closure of the perineal defect in abdomino-perineal wound closure were excluded.  
7  
8

### 9 10 **Consent**

11  
12 Patients were identified, approached and provided with a patient information leaflet. Consent  
13 for trial participation, was gained by either consultant surgeons or surgical registrars who had  
14 current 'Good Clinical Practice' certification.  
15  
16  
17

### 18 19 **Randomisation and Data Collection**

20  
21 An adaptive randomisation design was used to allocate eligible patients to groups of similar  
22 size [14]. Patients were randomised in a 1:1 ratio to either Mass closure or Hughes Repair.  
23 Randomisation took place during surgery and as close as possible to the time when the  
24 surgeon commenced closure. The patient was blinded to the treatment allocation assigned to  
25 them. Data management was supported by the Swansea Trials Unit.  
26  
27  
28  
29  
30

### 31 32 **Surgical Quality Assurance**

33  
34 To assure the quality of the repair techniques, all surgeons participating in the trial  
35 (consultants and registrars) completed training and quality assessment on the Hughes Repair.  
36 All participating surgeons were assessed by the Chief Investigator and were approved only  
37 when closure technique was satisfactory. A reference instructional video was provided to  
38 participating surgeons. To monitor the training of professionals contributing to HART, a log  
39 was maintained with details of training, both surgical and in research governance notably  
40 'Good Clinical Practice'. For the purposes of the study, mass closure was taken to be the  
41 responsible consultant surgeon's standard closure technique.  
42  
43  
44  
45  
46  
47  
48  
49

### 50 51 **Radiological Evaluation of incisional hernia**

52  
53 A dedicated trial radiologist determined whether there was a hernia present on the 1-year  
54 colorectal cancer surveillance CT scan. They defined an incisional hernia as herniation of the  
55 bowel or other intra-abdominal content outside the abdominal wall, and also identified the  
56  
57  
58  
59  
60

1  
2  
3 presence of other hernias and the quality of the recti muscle. All scans were performed using  
4 the standard departmental protocol for follow-up scans.  
5  
6

### 7 **Sample size**

8  
9  
10 The feasibility study aimed to recruit a total of 30 patients over a 5-month period. The sample  
11 size for the main study has been published previously [13].  
12  
13

### 14 **Funding**

15  
16  
17 The NIHR Health Technology Assessment programme requested this feasibility study as a  
18 prerequisite for awarding grant 12/35/29 for the pilot and main phases of HART.  
19  
20  
21  
22  
23  
24  
25  
26  
27  
28  
29  
30  
31  
32  
33  
34  
35  
36  
37  
38  
39  
40  
41  
42  
43  
44  
45  
46  
47  
48  
49  
50  
51  
52  
53  
54  
55  
56  
57  
58  
59  
60

## Results

### Recruitment and randomisation

A total of 62 patients were screened and assessed for eligibility for entry into the trial over a 5-month time period (**Figure 3**). Of those screened, 43 patients consented to entry into the trial (69%). A total of 30 of the 43 patients were randomised in the operating theatre (14 patients were randomised to arm A and 16 patients were randomised to arm B). The reasons for exclusion are described in the CONSORT diagram (**Figure 3**).

For the 30 patients who were randomised, the median age was 74 years (IQR 66-78). There were 23 males and 7 females. Demographical data is presented in **Table 1**. In arm A, one patient had died prior to 12-month follow-up and a further patient had transferred care to another unit. In arm B, one patient had died prior to 12-month follow-up.

### Safety data

There were a total of 16 serious adverse events reported in 10 patients (**Table 2**); serious adverse event rate was 33.3% in arm A and 31.25% in arm B. There were no suspected unexpected serious adverse reactions reported in either arm. With regard to wound related complications, there was 1 superficial surgical site infection and 2 organ space surgical site infection reported in arm A and 2 superficial surgical site infections and 1 complete wound dehiscence requiring a return to theatre in arm B (**Table 3**). The Data Monitoring Committee (DMC) reviewed the un-blinded adverse events data and identified no safety concerns.

## Discussion

The results of this feasibility study demonstrated that a randomised controlled trial designed to compare two suture techniques for the prevention of midline incisional hernia, in patients undergoing cancer resectional surgery, was able to recruit 30 patients over 5 months, as planned. This suggests that the proposed sample size of 800 patients for the main full trial is achievable in the time scale with the proposed number of sites recruiting (approximately 20) [13].

The feasibility study results established that the trial was acceptable to patients. Patient participation rates were high, demonstrated by 69% of all eligible patients consenting to participation in the trial. Nine patients were screened for eligibility but not consented due to staff shortages highlighting the importance of having adequate number of approved consenting staff on the delegation log. Due to the nature of the study it was accepted that not all patients consented would eventually be randomised. In fact, there was a higher than expected number of patients consented and not eventually randomised (31%). Patients were consented but not randomised if the intraoperative procedure performed did not meet the inclusion criteria, for example not midline incision, conversion to open procedure using a non-midline incision, or emergency patients found not to have a tumour intra-operatively.

The serious adverse event rate and wound related complications were similar between both arms and reassuringly there were no suspected unexpected serious adverse reactions reported. It is anticipated that reporting on the full trial will take place in 2019.

**List of abbreviations**

AAA: Abdominal aortic aneurysm

BMI: Body Mass Index

CONTINT: CONTinuous versus INTerrupted abdominal wall closure after emergency midline laparotomy

COPD: Chronic Obstructive Pulmonary Disease

CT: Computed tomography

DMC: Data Monitoring Committee

HART: Hughes Abdominal Repair Trial

IQR: interquartile range

NIHR: National Institute of Health Research

PDS: polydioxanone

SAEs: Serious Adverse Events

SSI: Surgical Site Infection

STITCH: Suture Techniques to reduce the Incidence of The incisional Hernia (RCT)

**Competing Interests**

There are no competing interests to declare

**Authors Contributions**

RLH, JC, DB, BR, JA, NF, ITR, JT conceived, designed and drafted the initial protocol

SMP, CM, JH, MLD, MMD, RH, SJ, PDR, aided in redrafting and revising the protocol and contributed heavily to completion of the feasibility trial and pilot stages

SI, AW, NB, ITR have written and designed the analysis plan and revised the protocol

JC, DB, ITR and JT led the team that acquired the funding

All authors agree to be accountable for all aspects of the work. All authors read and approved the final manuscript.

## References

1. Bosanquet D, Ansell J, Abdelrahman T, Cornish J, Harries R, Stimpson A, Davies L, Glasbey J, Frewer K, Frewer N, Russell D, Russell I, Torkington J. Systematic Review and Meta-Regression of factors affecting midline incisional hernia rates: Analysis of 14,618 patients. *PLoS ONE* 2015;10(9): e0138745.
2. van Ramshorst GH, Eker HH, Hop WC, Jeekel J, Lange JF. Impact of incisional hernia on health-related quality of life and body image: a prospective cohort study. *Am J Surg*, 2012;204(2):144-50.
3. Diener MK, Voss S, Jensen K, Büchler MW, Seiler CM. Elective midline laparotomy closure: the INLINE systematic review and meta-analysis. *Ann Surg*, 2010; 251(5):843-56.
4. van 't Riet M, Steyerberg EW, Nellensteyn J, Bonjer HJ, Jeekel J. Meta-analysis of techniques for closure of midline abdominal incisions. *Br J Surg*, 2002;89(11):1350-6.
5. Sajid MS, Parampalli U, Baig MK, McFall MR. A systematic review on the effectiveness of slowly-absorbable versus non-absorbable sutures for abdominal fascial closure following laparotomy. *Int J Surg*, 2011; 9(8):615-25.
6. Deerenberg EB, Harlaar JJ, Steyerberg EW, Lont HE, van Doorn HC, Heisterkamp J, Wijnhoven BP, Schouten WR, Cense HA, Stockmann HB, Berends FJ, Dijkhuizen FP, Dwarkasing RS, Jairam AP, van Ramshorst GH, Kleinrensink GJ, Jeekel J, Lange JF. Small bites versus large bites for closure of abdominal midline incisions (STITCH): a double-blind, multicentre, randomised controlled trial. *Lancet*. 2015, 386(10000):1254-60.
7. Rahbari NN, Knebel P, Kieser M, Bruckner T, Bartsch DK, Friess H, Mihaljevic AL, Stern J, Diener MK, Voss S, Rossion I, Büchler MW, Seiler CM. Design and current status of CONTINT: continuous versus interrupted abdominal wall closure after emergency midline laparotomy - a randomized controlled multicenter trial [NCT00544583]. *Trials*, 2012;13:72.
8. Hughes BR & Webster D. Leslie Ernest Hughes OBITUARY. *BMJ*, 2011. 343.
9. Shukla VK, Gupta A, Singh H, Pandey M, Gautam A. Cardiff repair of incisional hernia: a university hospital experience. *Eur J Surg*, 1998;164(4):271-4.

- 1  
2  
3 10. Mudge M, Harding KG, Hughes LE. Incisional hernia. *Br J Surg*, 1986;73(1): 82.  
4  
5  
6 11. Godara R, Garg P, Shankar G. Comparative evaluation of Cardiff repair and mesh plasty in  
7 incisional hernias. *Internet J Surg* [Internet]. 2007; 9 [about 8 p.].  
8  
9  
10 12. Malik R & Scott NA. Double near and far prolene suture closure: a technique for abdominal  
11 wall closure after laparostomy. *Br J Surg*, 2001;88(1):146-7.  
12  
13  
14 13. Cornish J, Harries RL, Bosanquet D, Rees B, Ansell J, Frewer N, Dhruva Rao P, Parry C, Ellis-  
15 Owen R, Phillips SM, Morris C, Horwood J, Davies ML, Davies MM, Hargest R, Hilton J, Harris D,  
16 Ben-Sassi A, Rajagopal R, Hanratty D, Islam S, Watkins A, Bashir N, Jones S, Russell IR,  
17 Torkington J, on behalf of the HART Trial Management Group. Hughes Abdominal Repair Trial  
18 (HART) - Abdominal wall closure techniques to reduce the incidence of incisional hernias:  
19 Study protocol for a multi-centre pragmatic randomised controlled trial (ISRCTN 25616490).  
20 *Trials* 2016; 17(1):454.  
21  
22  
23  
24  
25  
26  
27  
28 14. Russell D, Hoare ZSJ, Whitaker Rh, Whitaker CJ, Russell IT. Generalised method for  
29 adaptive randomisation in clinical trials. *Statistics in Medicine* 2011; 30: 922-34.  
30  
31  
32  
33  
34  
35  
36  
37  
38  
39  
40  
41  
42  
43  
44  
45  
46  
47  
48  
49  
50  
51  
52  
53  
54  
55  
56  
57  
58  
59  
60



**Table 1. Patient demographics and clinical characteristics**

|                                               | <b>Arm A</b><br>(N=14) | <b>Arm B</b><br>(N=16) | <b>Total</b><br>(N=30) |
|-----------------------------------------------|------------------------|------------------------|------------------------|
| Gender                                        |                        |                        |                        |
| Male                                          | 10 (71.4%)             | 13 (81.3%)             | 23 (76.7%)             |
| Female                                        | 4 (28.6%)              | 3 (18.7%)              | 7 (23.3%)              |
| Median Age<br>(IQR)                           | 75<br>(61-78)          | 73<br>(68- 77)         | 74<br>(66-78)          |
| Mean BMI<br>(Min-Max)                         | 30<br>(22-49)          | 29<br>(18-42)          | 29<br>(18-49)          |
| Smoker                                        | 1 (7.1%)               | 3 (18.8%)              | 4 (13.3%)              |
| Steroid/ immunosuppression use                | 0 (0%)                 | 0 (0%)                 | 0 (0%)                 |
| Diabetes                                      | 5 (35.7%)              | 4 (25%)                | 9 (30%)                |
| Connective tissue disorder                    | 1 (7.1%)               | 0 (0%)                 | 1 (3.3%)               |
| COPD                                          | 1 (7.1%)               | 2 (12.5%)              | 3 (9.9%)               |
| AAA (known or previous repair)                | 0 (0%)                 | 0 (0%)                 | 0 (0%)                 |
| Previous abdominal surgery                    | 8 (57.1%)              | 8 (50%)                | 15 (50%)               |
| Neoadjuvant chemotherapy                      | 1 (7.1%)               | 0 (0%)                 | 1 (3.3%)               |
| Neoadjuvant radiotherapy                      | 1 (7.1%)               | 1 (6.3%)               | 2 (6.6%)               |
| Incisional Hernia present pre-operatively     | 0 (0%)                 | 1 (6.3%)               | 1 (3.3%)               |
| Previous incisional hernia repair             | 1 (7.1%)               | 0 (0%)                 | 1 (3.3%)               |
| Non incisional hernia present pre-operatively | 0 (0%)                 | 3 (18.8%)              | 3 (9.9%)               |
| Mode of surgery                               |                        |                        |                        |
| Laparoscopic                                  | 4 (28.6%)              | 6 (37.5%)              | 10 (33.3%)             |
| Laparoscopic converted                        | 7 (50%)                | 3 (18.8%)              | 10 (33.3%)             |
| Open                                          | 3 (21.4%)              | 7 (43.7%)              | 10 (33.3%)             |

**Table 2. Reported serious adverse events**

|                                     | <b>Arm A</b> | <b>Arm B</b> |
|-------------------------------------|--------------|--------------|
| Myocardial infarction               | 2            | 2            |
| Lower respiratory tract infection   | 2            | 1            |
| Pulmonary embolism                  | 1            | 0            |
| Renal failure                       | 0            | 1            |
| Anastomotic leak                    | 2            | 0            |
| Parastomal hernia                   | 0            | 1            |
| Superficial surgical site infection | 2            | 0            |
| Dehiscence                          | 0            | 1            |
| Death*                              | 1            | 0            |
| <b>Total SAEs</b>                   | <b>10</b>    | <b>6</b>     |
| <b>Total Patients affected</b>      | <b>5</b>     | <b>5</b>     |

\* 1 SAE reported was reported as 'death', therefore it has had to be listed as an event of death. There were two other SAEs that resulted in death within the feasibility study

**Table 3. Wound related complications**

|                                          | <b>Arm A</b> | <b>Arm B</b> |
|------------------------------------------|--------------|--------------|
| Superficial SSI                          | 1            | 2            |
| Deep SSI                                 | 0            | 0            |
| Organ space SSI                          | 2            | 0            |
| Wound dehiscence                         | 0            | 1            |
| <b>Total wound related complications</b> | <b>3</b>     | <b>3</b>     |

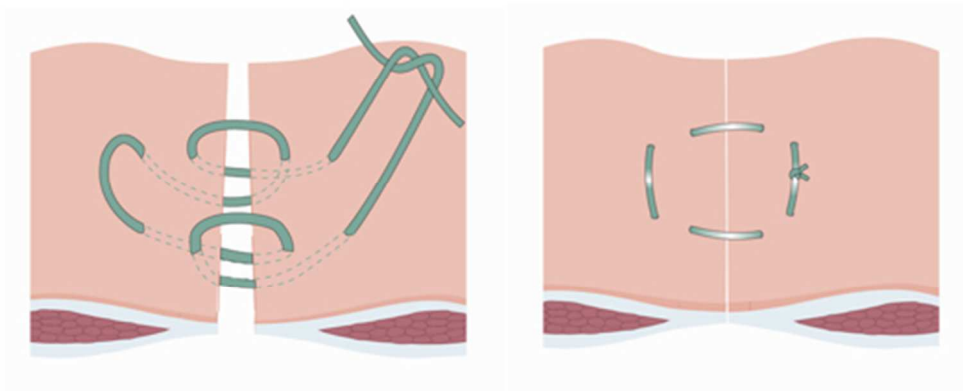

Figure 1. Diagram showing the Hughes closure method, using a combination of standard mass closure with a series of horizontal and two vertical mattress sutures within a single suture. When the sutures are pulled to close the defect, the sutures lie both across and along the incision.

191x79mm (72 x 72 DPI)

1  
2  
3  
4  
5  
6  
7  
8  
9  
10  
11  
12  
13  
14  
15  
16  
17  
18  
19  
20  
21  
22  
23  
24  
25  
26  
27  
28  
29  
30  
31  
32  
33  
34  
35  
36  
37  
38  
39  
40  
41  
42  
43  
44  
45  
46  
47  
48  
49  
50  
51  
52  
53  
54  
55  
56  
57  
58  
59  
60

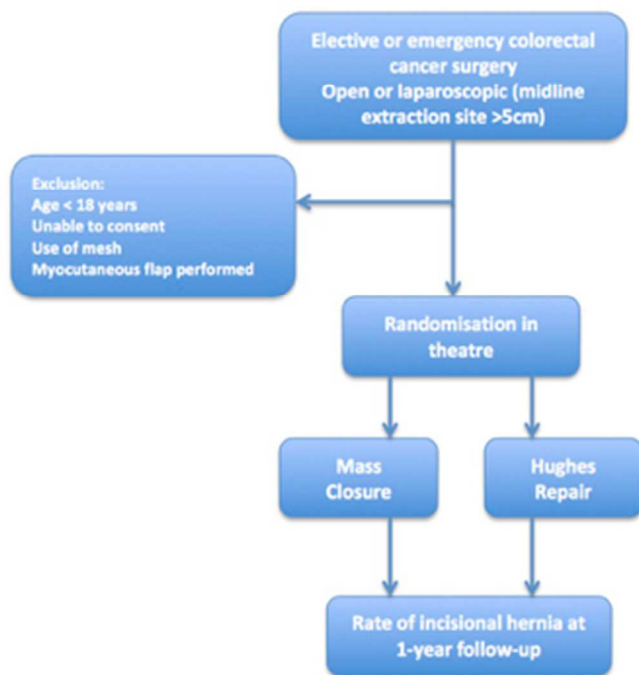

Figure 2. HART Study Design

180x132mm (72 x 72 DPI)

ew only

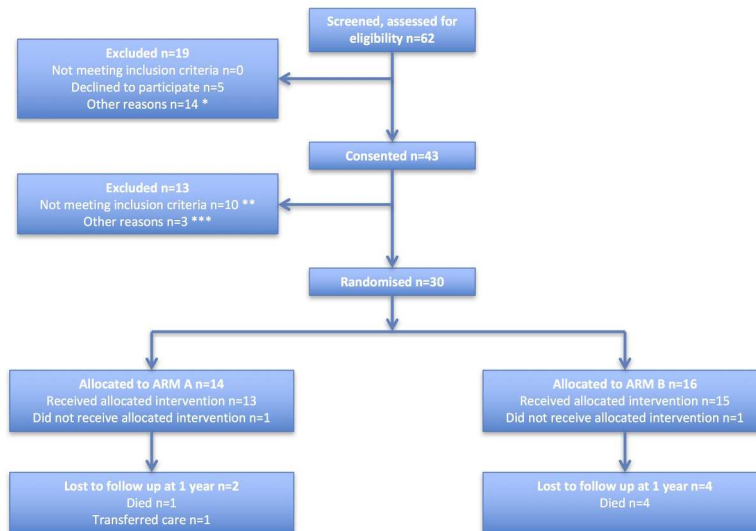

\* 9 patients not approached due to staff holidays, 5 patients were screened but not included as feasibility study closed  
 \*\* 9 patients did not have midline incision >5cm, 1 patient did not have cancer  
 \*\*\* 1 patient was missed in theatre, 2 patients changed their mind before surgery

Figure 3. CONSORT diagram

254x190mm (300 x 300 DPI)

Peer Review Only

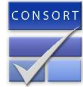

## CONSORT 2010 checklist of information to include when reporting a randomised trial\*

| Section/Topic                    | Item No | Checklist item                                                                                                                                                                              | Reported on page No |
|----------------------------------|---------|---------------------------------------------------------------------------------------------------------------------------------------------------------------------------------------------|---------------------|
| <b>Title and abstract</b>        |         |                                                                                                                                                                                             |                     |
|                                  | 1a      | Identification as a randomised trial in the title                                                                                                                                           | 1                   |
|                                  | 1b      | Structured summary of trial design, methods, results, and conclusions (for specific guidance see CONSORT for abstracts)                                                                     | 2                   |
| <b>Introduction</b>              |         |                                                                                                                                                                                             |                     |
| Background and objectives        | 2a      | Scientific background and explanation of rationale                                                                                                                                          | 4-5                 |
|                                  | 2b      | Specific objectives or hypotheses                                                                                                                                                           | 4-6                 |
| <b>Methods</b>                   |         |                                                                                                                                                                                             |                     |
| Trial design                     | 3a      | Description of trial design (such as parallel, factorial) including allocation ratio                                                                                                        | 6                   |
|                                  | 3b      | Important changes to methods after trial commencement (such as eligibility criteria), with reasons                                                                                          | n/a                 |
| Participants                     | 4a      | Eligibility criteria for participants                                                                                                                                                       | 6-7                 |
|                                  | 4b      | Settings and locations where the data were collected                                                                                                                                        | 6-7                 |
| Interventions                    | 5       | The interventions for each group with sufficient details to allow replication, including how and when they were actually administered                                                       | 7-8                 |
| Outcomes                         | 6a      | Completely defined pre-specified primary and secondary outcome measures, including how and when they were assessed                                                                          | n/a                 |
|                                  | 6b      | Any changes to trial outcomes after the trial commenced, with reasons                                                                                                                       | n/a                 |
| Sample size                      | 7a      | How sample size was determined                                                                                                                                                              | 8                   |
|                                  | 7b      | When applicable, explanation of any interim analyses and stopping guidelines                                                                                                                | n/a                 |
| <b>Randomisation:</b>            |         |                                                                                                                                                                                             |                     |
| Sequence generation              | 8a      | Method used to generate the random allocation sequence                                                                                                                                      | 7                   |
|                                  | 8b      | Type of randomisation; details of any restriction (such as blocking and block size)                                                                                                         | 7                   |
| Allocation concealment mechanism | 9       | Mechanism used to implement the random allocation sequence (such as sequentially numbered containers), describing any steps taken to conceal the sequence until interventions were assigned | 7                   |
| Implementation                   | 10      | Who generated the random allocation sequence, who enrolled participants, and who assigned participants to interventions                                                                     | 7                   |
| Blinding                         | 11a     | If done, who was blinded after assignment to interventions (for example, participants, care providers, those                                                                                | 7                   |

|                                                      |     |                                                                                                                                                   |     |
|------------------------------------------------------|-----|---------------------------------------------------------------------------------------------------------------------------------------------------|-----|
|                                                      |     | assessing outcomes) and how                                                                                                                       |     |
|                                                      | 11b | If relevant, description of the similarity of interventions                                                                                       |     |
| Statistical methods                                  | 12a | Statistical methods used to compare groups for primary and secondary outcomes                                                                     | n/a |
|                                                      | 12b | Methods for additional analyses, such as subgroup analyses and adjusted analyses                                                                  | n/a |
| <b>Results</b>                                       |     |                                                                                                                                                   |     |
| Participant flow (a diagram is strongly recommended) | 13a | For each group, the numbers of participants who were randomly assigned, received intended treatment, and were analysed for the primary outcome    | 9   |
|                                                      | 13b | For each group, losses and exclusions after randomisation, together with reasons                                                                  | 9   |
| Recruitment                                          | 14a | Dates defining the periods of recruitment and follow-up                                                                                           | 9   |
|                                                      | 14b | Why the trial ended or was stopped                                                                                                                | 9   |
| Baseline data                                        | 15  | A table showing baseline demographic and clinical characteristics for each group                                                                  | 14  |
| Numbers analysed                                     | 16  | For each group, number of participants (denominator) included in each analysis and whether the analysis was by original assigned groups           | 9   |
| Outcomes and estimation                              | 17a | For each primary and secondary outcome, results for each group, and the estimated effect size and its precision (such as 95% confidence interval) | n/a |
|                                                      | 17b | For binary outcomes, presentation of both absolute and relative effect sizes is recommended                                                       | n/a |
| Ancillary analyses                                   | 18  | Results of any other analyses performed, including subgroup analyses and adjusted analyses, distinguishing pre-specified from exploratory         | n/a |
| Harms                                                | 19  | All important harms or unintended effects in each group (for specific guidance see CONSORT for harms)                                             | n/a |
| <b>Discussion</b>                                    |     |                                                                                                                                                   |     |
| Limitations                                          | 20  | Trial limitations, addressing sources of potential bias, imprecision, and, if relevant, multiplicity of analyses                                  | 10  |
| Generalisability                                     | 21  | Generalisability (external validity, applicability) of the trial findings                                                                         | 10  |
| Interpretation                                       | 22  | Interpretation consistent with results, balancing benefits and harms, and considering other relevant evidence                                     | 10  |
| <b>Other information</b>                             |     |                                                                                                                                                   |     |
| Registration                                         | 23  | Registration number and name of trial registry                                                                                                    | 1   |
| Protocol                                             | 24  | Where the full trial protocol can be accessed, if available                                                                                       | 6   |
| Funding                                              | 25  | Sources of funding and other support (such as supply of drugs), role of funders                                                                   | 8   |

\*We strongly recommend reading this statement in conjunction with the CONSORT 2010 Explanation and Elaboration for important clarifications on all the items. If relevant, we also recommend reading CONSORT extensions for cluster randomised trials, non-inferiority and equivalence trials, non-pharmacological treatments, herbal interventions, and pragmatic trials. Additional extensions are forthcoming: for those and for up to date references relevant to this checklist, see [www.consort-statement.org](http://www.consort-statement.org).



# BMJ Open

## Hughes Abdominal Repair Trial (HART) - Abdominal wall closure techniques to reduce the incidence of incisional hernias: Feasibility trial for a multi-centre pragmatic randomised controlled trial

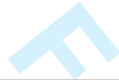

|                                 |                                                                                                                                                                                                                                                                                                                                                                                                                                                                                                                                                                                                                                                                                                                                                                                                             |
|---------------------------------|-------------------------------------------------------------------------------------------------------------------------------------------------------------------------------------------------------------------------------------------------------------------------------------------------------------------------------------------------------------------------------------------------------------------------------------------------------------------------------------------------------------------------------------------------------------------------------------------------------------------------------------------------------------------------------------------------------------------------------------------------------------------------------------------------------------|
| Journal:                        | <i>BMJ Open</i>                                                                                                                                                                                                                                                                                                                                                                                                                                                                                                                                                                                                                                                                                                                                                                                             |
| Manuscript ID                   | bmjopen-2017-017235.R1                                                                                                                                                                                                                                                                                                                                                                                                                                                                                                                                                                                                                                                                                                                                                                                      |
| Article Type:                   | Research                                                                                                                                                                                                                                                                                                                                                                                                                                                                                                                                                                                                                                                                                                                                                                                                    |
| Date Submitted by the Author:   | 18-Aug-2017                                                                                                                                                                                                                                                                                                                                                                                                                                                                                                                                                                                                                                                                                                                                                                                                 |
| Complete List of Authors:       | Harries, Rhiannon; University Hospital of Wales, Department of Colorectal Surgery; Welsh Barbers Research Group<br>Cornish, Julie; Welsh Barbers Research Group; Royal Glamorgan Hospital, Department of Colorectal Surgery<br>Bosanquet, David; University Hospital of Wales, Department of Colorectal Surgery; Welsh Barbers Research Group<br>Rees, Buddug; University Hospital of Wales, Department of Colorectal Surgery<br>Horwood, James; University Hospital of Wales, Department of Colorectal Surgery<br>Islam, Saiful; Swansea University, Trials Unit<br>Bashir, Nadim; Swansea University, Trials Unit<br>Watkins, Alan; Swansea University, Trials Unit<br>Russell, Ian; Swansea University, Trials Unit<br>Torkington, Jared; University Hospital of Wales, Department of Colorectal Surgery |
| <b>Primary Subject Heading</b>: | Surgery                                                                                                                                                                                                                                                                                                                                                                                                                                                                                                                                                                                                                                                                                                                                                                                                     |
| Secondary Subject Heading:      | Evidence based practice                                                                                                                                                                                                                                                                                                                                                                                                                                                                                                                                                                                                                                                                                                                                                                                     |
| Keywords:                       | incisional hernia, abdominal closure, hughes repair, mass closure, randomised controlled trial, colorectal cancer                                                                                                                                                                                                                                                                                                                                                                                                                                                                                                                                                                                                                                                                                           |
|                                 |                                                                                                                                                                                                                                                                                                                                                                                                                                                                                                                                                                                                                                                                                                                                                                                                             |

SCHOLARONE™  
Manuscripts

1  
2  
3 **Hughes Abdominal Repair Trial (HART) - Abdominal wall closure techniques to**  
4 **reduce the incidence of incisional hernias: Feasibility trial for a multi-centre**  
5 **pragmatic randomised controlled trial (ISRCTN 25616490)**  
6  
7  
8

9  
10 Harries RL<sup>1,2</sup>, Cornish J<sup>2,3</sup>, Bosanquet D<sup>1,2</sup>, Rees B<sup>1</sup>, Horwood J<sup>1</sup>, Islam S<sup>4</sup>, Bashir N<sup>4</sup>, Watkins A<sup>4</sup>,  
11 Russell IT<sup>4</sup>, Torkington J<sup>1</sup>; on behalf of the HART Trial Management Group  
12

13  
14 1 University Hospital of Wales, Cardiff

15 2 Welsh Barbers Research Group

16 3 Royal Glamorgan Hospital, Llantrisant

17 4 Swansea Trials Unit, Swansea University  
18  
19  
20  
21  
22

23 **Correspondence should be addressed to:**

24  
25 Prof Jared Torkington, Dep. of Surgery, University Hospital of Wales, Heath Park, Cardiff CF14 4XW  
26 [jared.torkington@wales.nhs.uk](mailto:jared.torkington@wales.nhs.uk) Tel: +44 2920 747747  
27  
28  
29  
30  
31  
32

33 **Word count:** 2240

34  
35 **Article type:** Randomised controlled trial  
36  
37

38 **Running title:** Hughes Abdominal Repair Trial: Feasibility trial  
39  
40

41 **Conflict of interest:** None declared  
42  
43

44 **Keywords:** Incisional hernia; Abdominal closure; Hughes repair; Mass closure; randomised  
45 controlled trial; colorectal cancer  
46  
47  
48  
49  
50  
51  
52  
53  
54  
55  
56  
57  
58  
59  
60

## Abstract

**Objectives:** Incisional hernias are common complications of midline abdominal closure. The 'Hughes Repair' combines a standard mass closure with a series of horizontal and two vertical mattress sutures within a single suture. There is evidence to suggest this technique is as effective as mesh repair for the operative management of incisional hernias; however, no trials have compared Hughes Repair with standard mass closure for the prevention of incisional hernia formation. This paper aims to test the feasibility of running a randomised controlled trial of a comparison of abdominal wall closure methods following midline incisional surgery for colorectal cancer, in preparation to a definitive randomised controlled trial.

**Design and Setting:** A feasibility trial (with 1:1 randomisation) conducted perioperatively during colorectal cancer surgery.

**Participants:** Patients undergoing midline incisional surgery for resection of colorectal cancer.

**Interventions:** Comparison of two suture techniques (Hughes repair or standard mass closure) for the closure of the midline abdominal wound following surgery for colorectal cancer.

**Primary and Secondary Outcomes:** A 30-patient feasibility trial assessed recruitment, randomisation, deliverability and early safety of the surgical techniques used.

**Results:** A total of 30 patients were randomised from 43 patients recruited and consented, over a 5-month period. 14 and 16 patients were randomised to Arm A and B, respectively. There was 1 superficial surgical site infection (SSI) and 2 organ space SSI reported in arm A and 2 superficial SSI and 1 complete wound dehiscence in arm B. There were no suspected unexpected serious adverse reactions reported in either arm. Independent data monitoring committee found no early safety concerns.

**Conclusions:** The feasibility trial found no early safety concerns and demonstrated that the trial was acceptable to patients. Progression to the pilot and main phases of the trial has now commenced following approval by the independent data monitoring committee.

**Trial registration:** ISRCTN 25616490

## Strengths and Limitations of this study

- The results of this feasibility trial demonstrate that recruitment to a randomised controlled trial comparing suturing techniques in midline incisions following colorectal cancer resection surgery is acceptable to patients with no early safety concerns identified
- This feasibility trial is not powered for a definitive study and simply reports the recruitment, deliverability and safety
- We report blinded outcome data and have not included incisional hernia rates in order to prevent the introduction of bias or reduction of equipoise for future recruitment of the main trial
- We acknowledge that randomising immediately prior to abdominal closure may increase the risk of selection bias into the trial, however to overcome this we have collected information on the reasons why patients were not randomised after consenting in the screening log.
- The setting of the feasibility trial was chosen as the trial's lead site; a high volume teaching hospital. This poses a potential limitation for the main trial at lower volume centres, in terms of ability to recruit participants over the time-period (3 years). However, the sample size required for the pilot and main trial is 800 across roughly 20 sites, which equates to 40 participants required per site and should be achievable over the trial time-period, even for lower volume centres, given the incidence of colorectal cancer in the UK.
- The HART trial is a pragmatic trial and as such we are allowing the control (mass closure) arm to be the responsible consultant surgeon's standard closure technique. We acknowledge that this may introduce a degree of variability in the control arm, but in order to counter this our sample size for the main trial has been powered to be able to stratify for site and surgeon.

## Introduction

Incisional hernias are common complications of midline abdominal incisions, with a reported incidence of 12.8% at 2 years follow-up in a systematic review of 14,618 patients [1]. Within patients who have undergone colorectal cancer resectional surgery, the rate of incisional hernia has been reported as high as 39.9%, including both open and laparoscopic approaches (40.9% and 37.1%, respectively) [2]. They can result in significant morbidity, impaired quality of life [3] and frequently require emergency surgery. Despite recent development in mesh technology, incisional hernia repair still has disappointingly high recurrence rates (up to 54% in suture repair and up to 36% in mesh repair [4-5]). Prevention of the development of incisional hernia therefore brings significant benefits for both patients and healthcare provision funding.

'Mass closure' remains the standard technique for abdominal closure (closing all layers of the abdominal wall, excluding the skin), with either non-absorbable or slow-resorbing sutures, such as polydioxanone (PDS) [6]. A systematic review and meta-regression of over 14,000 patients found no difference in incisional hernia rate comparing suture material [1]. This poses the question as to whether improved suture technique may reduce incisional hernia formation. The STITCH trial [7], a Dutch multicentre, randomised controlled trial compared small stitch continuous sutures with large stitch standard mass closure in 560 patients. Results demonstrated a reduction in the rate of incisional hernia from 21% in the large bite group to 13% in the small bite group at one-year follow-up. The CONTINT trial, currently still in recruitment, is comparing continuous with interrupted sutures in closing midline incisions after emergency laparotomy [8].

The European Hernia Society Guidance on the closure of abdominal wall incisions (2015) recommended the use of prophylactic mesh augmentation for an elective midline laparotomy in a high-risk patient in order to reduce the risk of incisional hernia [9]. However, firstly, they determined that the evidence base for this was weak and secondly, in the UK mesh augmentation closure is infrequently used. It is for these reasons that it is still critical for other closure methods to be rigorously assessed for their role in incisional hernia prevention.

The eponymously titled 'Hughes Repair' (Professor Les Hughes, 1932-2011 [10]), also known as the 'far-and-near' or 'Cardiff Repair' [11] combines a standard mass closure (two loop 1 PDS sutures) with a series of horizontal and two vertical mattress sutures within a single suture (1

1  
2  
3 Nylon); theoretically distributing the load along the incision length as well as across it (**Figure**

4  
5 **1).** The principles are:

- 6  
7  
8  
9  
10  
11  
12  
13  
14
1. To ensure, by palpation, that only sound normal tissues are used for the repair
  2. To use graduated tension for easy approximation
  3. Use a monofilament Nylon suture, which has the advantage of slipping easily through tissues to create a pulley system [12].

15  
16  
17  
18  
19  
20  
21  
22  
23  
24  
25  
26  
27  
28  
29  
30  
31  
32  
33  
34  
35  
36  
37  
38  
39  
40  
41  
42  
43  
44  
45  
46  
47  
48  
49  
50  
51  
52  
53  
54  
55  
56  
57  
58  
59  
60

The Hughes Repair has been shown to have outcomes as effective as the standard mesh repair in incisional hernia repairs [13]. It is also used for closing abdomens when patients are at high risk of incisional hernias, after complete abdominal wound dehiscence and laparostomy [14].

This feasibility trial aimed to establish whether a randomised controlled trial to compare Hughes Repair with standard mass closure for prevention of midline incisional hernia, in patients undergoing colorectal cancer resectional surgery, would be deemed acceptable to patients, achieve adequate recruitment and result in no early safety concerns.

## Methods/Design

### Study Design

The HART trial hypothesis is that the Hughes Repair will reduce the incidence of clinically detected incisional hernia at one year in patients undergoing midline abdominal wall closure incisions following elective or emergency colorectal cancer surgery when compared with standard mass closure **Figure 2**. This is a 1:1 randomised controlled trial comparing two suture techniques for the closure of the midline abdominal wound following surgery for colorectal cancer. The study was approved by the Wales Research Ethics Committee (MREC 12/WA/0374).

### Setting and location

The feasibility trial took place at the trial's lead site University Hospital of Wales, Cardiff; a high-volume teaching hospital (1 of the 20 proposed recruitment sites for the main trial).

### Aims and outcome measures

The feasibility trial aimed to assess the ability of the trial to recruit and consent patients over a 5-month period and the deliverability and safety of the Hughes Repair. The acceptability was assessed in terms of percentage of consenting versus refusing participants. Adequacy of recruitment is assessed in terms of number of recruited participants. Operation specific adverse events collected included surgical site infection and full wound dehiscence. Early surgical safety was assessed using post-operative complications, serious adverse event reporting and wound diaries. In this paper we report blinded outcome data and have not included incisional hernia rates in order to prevent the introduction of bias or reduction of equipoise for future recruitment of the main trial.

Independent data monitoring committee reviewed the un-blinded safety data after completion of the feasibility phase. The outcome measures for the full trial have been previously reported [15]; Primary outcome measure being the rate of incisional hernia at 1-year follow-up assessed by clinical examination. The full trial protocol can be accessed via the following link: <https://njl-admin.nihr.ac.uk/document/download/2007245>

### Eligibility Criteria

1  
2  
3 Eligibility criteria were assessed at two time points; at initial screening and at point of surgical  
4 closure /randomisation. Adult patients (aged 18 year or over), able to give informed consent,  
5 undergoing either elective colorectal cancer surgery following full staging investigations  
6 including an abdominal CT scan or emergency surgery in those with a strong suspicion of  
7 colorectal cancer on abdominal CT scan were eligible at point of initial screening. All patients  
8 had to be suitable for either Hughes repair or standard mass closure. At point of surgical  
9 closure, eligibility was further assessed, and all patients who had a midline incision (open or  
10 laparoscopic assisted/ converted) of 5cm or more in length were deemed suitable for  
11 randomisation. Patients requiring mesh insertion or having an abdominal musculofascial flap  
12 for closure of the perineal defect in abdomino-perineal wound closure were excluded.  
13  
14  
15  
16  
17  
18  
19

### 20 21 **Consent**

22  
23  
24 Patients were identified, approached and provided with a patient information leaflet. Consent  
25 for trial participation, was gained by either consultant surgeons or surgical registrars who had  
26 current 'Good Clinical Practice' certification.  
27  
28  
29

### 30 31 **Randomisation and Data Collection**

32  
33 An adaptive randomisation design was used to allocate eligible patients to groups of similar  
34 size [16]. Patients were randomised in a 1:1 ratio to either Mass closure or Hughes Repair.  
35 Randomisation took place during surgery and as close as possible to the time when the  
36 surgeon commenced closure. During the feasibility trial, a telephone randomisation system  
37 was used. The patient was blinded to the treatment allocation assigned to them. Data  
38 management was supported by the Swansea Trials Unit.  
39  
40  
41  
42  
43  
44

### 45 46 **Surgical Quality Assurance**

47  
48 To assure the quality of the repair techniques, all surgeons participating in the trial  
49 (consultants and registrars) completed training and quality assessment on the Hughes Repair.  
50 All participating surgeons were assessed by the Chief Investigator and were approved only  
51 when closure technique was satisfactory. A reference instructional video was provided to  
52 participating surgeons. To monitor the training of professionals contributing to HART, a log  
53 was maintained with details of training, both surgical and in research governance notably  
54  
55  
56  
57  
58  
59  
60



1  
2  
3 'Good Clinical Practice'. For the purposes of this pragmatic study, mass closure was taken to  
4 be the responsible consultant surgeon's standard closure technique.  
5  
6

### 7 **Radiological Evaluation of incisional hernia**

8  
9  
10 A dedicated trial radiologist determined whether there was a hernia present on the 1-year  
11 colorectal cancer surveillance CT scan. They defined an incisional hernia as herniation of the  
12 bowel or other intra-abdominal content outside the abdominal wall, and also identified the  
13 presence of other hernias and the quality of the recti muscle. All scans were performed using  
14 the standard departmental protocol for follow-up scans.  
15  
16  
17  
18

### 19 **Sample size**

20  
21  
22 The feasibility trial aimed to recruit a total of 30 patients over a 5-month period. The sample  
23 size for the main study has been published previously [14].  
24  
25  
26

### 27 **Funding**

28  
29  
30 The NIHR Health Technology Assessment programme requested this feasibility trial as a  
31 prerequisite for awarding grant 12/35/29 for the pilot and main phases of HART.  
32  
33

### 34 **Adverse events**

35  
36  
37 An adverse event (AE) was defined as any untoward medical occurrence in a clinical trial  
38 participant to whom a study intervention has been administered and which does not  
39 necessarily have a causal relationship with this treatment. An AE can therefore be any  
40 unfavourable and unintended sign (including abnormal laboratory finding), symptom or  
41 disease. The following listed AEs that are considered expected for patients undergoing  
42 colorectal surgery: lower respiratory tract infection, urinary tract infection, anastomotic  
43 leak, intra-abdominal sepsis, deep vein thrombosis, pulmonary embolus, wound infection,  
44 surgical site infection, wound breakdown, paralytic ileus, bleeding, myocardial infarction, and  
45 stoma complications (prolapsed, retraction, dehiscence or hernia). However, if these events  
46 lead to death, that would be considered unexpected. These events may be classified as serious  
47 and will be recorded as such but will not require reporting to Research Ethics Committee.  
48 Additional information may be requested for adverse events of special interest such as wound  
49 breakdown and surgical site infections.  
50  
51  
52  
53  
54  
55  
56  
57  
58  
59  
60

1  
2  
3 A serious adverse event (SAE) is an adverse event which results in any of the following: death,  
4 was life-threatening, required hospitalization or prolongation of existing hospitalization,  
5 persistent or significant disability or incapacity, consists of a congenital anomaly or birth  
6 defect, or is otherwise considered medically significant by the investigator.  
7  
8  
9

### 10 11 **Statistical analysis**

12  
13 A two-tailed fisher's exact test was used to compare SAE rate between both arms. Differences  
14 were considered to be statistically significant at  $p \leq 0.05$ .  
15  
16  
17  
18  
19  
20  
21  
22  
23  
24  
25  
26  
27  
28  
29  
30  
31  
32  
33  
34  
35  
36  
37  
38  
39  
40  
41  
42  
43  
44  
45  
46  
47  
48  
49  
50  
51  
52  
53  
54  
55  
56  
57  
58  
59  
60

## Results

### Recruitment and randomisation

A total of 62 patients were screened and assessed for eligibility for entry into the trial over a 5-month time period, October 2013 to February 2014. (**Figure 3**). Of those screened, 43 patients consented to entry into the trial (69%). A total of 30 of the 43 patients were randomised in the operating theatre (14 patients were randomised to arm A and 16 patients were randomised to arm B). The reasons for exclusion are described in the CONSORT diagram (**Figure 3**).

For the 30 patients who were randomised, the median age was 74 years (IQR 66-78). There were 23 males and 7 females. Demographical data is presented in **Table 1**.

**Table 1. Patient demographics and clinical characteristics**

|                                               | Arm A<br>(N=14) | Arm B<br>(N=16) | Total<br>(N=30) |
|-----------------------------------------------|-----------------|-----------------|-----------------|
| Gender                                        |                 |                 |                 |
| Male                                          | 10 (71%)        | 13 (81%)        | 23 (77%)        |
| Female                                        | 4 (29%)         | 3 (19%)         | 7 (23%)         |
| Median Age<br>(IQR)                           | 75<br>(61-78)   | 73<br>(68- 77)  | 74<br>(66-78)   |
| Mean BMI<br>(Min-Max)                         | 30<br>(22-49)   | 29<br>(18-42)   | 29<br>(18-49)   |
| Smoker                                        | 1 (7%)          | 3 (19%)         | 4 (13%)         |
| Steroid/ immunosuppression use                | 0 (0%)          | 0 (0%)          | 0 (0%)          |
| Diabetes                                      | 5 (36%)         | 4 (25%)         | 9 (30%)         |
| Connective tissue disorder                    | 1 (7%)          | 0 (0%)          | 1 (3%)          |
| COPD                                          | 1 (7%)          | 2 (13%)         | 3 (10%)         |
| AAA (known or previous repair)                | 0 (0%)          | 0 (0%)          | 0 (0%)          |
| Previous abdominal surgery                    | 8 (57%)         | 8 (50%)         | 15 (50%)        |
| Neoadjuvant chemotherapy                      | 1 (7%)          | 0 (0%)          | 1 (3%)          |
| Neoadjuvant radiotherapy                      | 1 (7%)          | 1 (6%)          | 2 (7%)          |
| Incisional Hernia present pre-operatively     | 0 (0%)          | 1 (6%)          | 1 (3%)          |
| Previous incisional hernia repair             | 1 (7%)          | 0 (0%)          | 1 (3%)          |
| Non incisional hernia present pre-operatively | 0 (0%)          | 3 (19%)         | 3 (10%)         |
| Mode of surgery                               |                 |                 |                 |
| Laparoscopic                                  | 4 (27%)         | 6 (38%)         | 10 (33%)        |
| Laparoscopic converted                        | 7 (50%)         | 3 (19%)         | 10 (33%)        |
| Open                                          | 3 (21%)         | 7 (44%)         | 10 (33%)        |

In arm A, one patient had died prior to 12-month follow-up and a further patient had transferred care to another unit. In arm B, one patient had died prior to 12-month follow-up.

### Safety data

There were a total of 16 serious adverse events reported in 10 patients (**Table 2**);

**Table 2. Reported serious adverse events**

|                                     | Arm A     | Arm B    |
|-------------------------------------|-----------|----------|
| Myocardial infarction               | 2         | 2        |
| Lower respiratory tract infection   | 2         | 1        |
| Pulmonary embolism                  | 1         | 0        |
| Renal failure                       | 0         | 1        |
| Anastomotic leak                    | 2         | 0        |
| Parastomal hernia                   | 0         | 1        |
| Superficial surgical site infection | 2         | 0        |
| Dehiscence                          | 0         | 1        |
| Death*                              | 1         | 0        |
| <b>Total SAEs</b>                   | <b>10</b> | <b>6</b> |
| <b>Total Patients affected</b>      | <b>5</b>  | <b>5</b> |

\* 1 SAE reported was reported as 'death', therefore it has had to be listed as an event of death. There were two other SAEs that resulted in death within the feasibility study

serious adverse event rate was 34% in arm A and 31% in arm B ( $p=1.0000$ ). There were no suspected unexpected serious adverse reactions reported in either arm. With regard to wound related complications, there was 1 superficial surgical site infection and 2 organ space surgical site infections reported in arm A and 2 superficial surgical site infections and 1 complete wound dehiscence requiring a return to theatre in arm B (**Table 3**).

**Table 3. Wound related complications**

|                                          | <b>Arm A</b> | <b>Arm B</b> |
|------------------------------------------|--------------|--------------|
| Superficial SSI                          | 1            | 2            |
| Deep SSI                                 | 0            | 0            |
| Organ space SSI                          | 2            | 0            |
| Wound dehiscence                         | 0            | 1            |
| <b>Total wound related complications</b> | <b>3</b>     | <b>3</b>     |

The Data Monitoring Committee (DMC) reviewed the un-blinded adverse events data and identified no safety concerns.

## Discussion

The results of this feasibility trial demonstrated that a randomised controlled trial designed to compare two suture techniques for the prevention of midline incisional hernia, in patients undergoing cancer resectional surgery, was able to recruit 30 patients over 5 months, as planned. This suggests that the proposed sample size of 800 patients for the main full trial is achievable in the time scale with the proposed number of sites recruiting (approximately 20) [14].

The feasibility trial results established that the trial was acceptable to patients. Patient participation rates were high, demonstrated by 69% of all eligible patients consenting to participation in the trial. Nine patients were screened for eligibility but not consented due to staff shortages highlighting the importance of having adequate number of approved consenting staff on the delegation log. Due to the nature of the study it was accepted that not all patients consented would eventually be randomised. In fact, there was a higher than expected number of patients consented and not eventually randomised (31%). Patients were consented but not randomised if the intraoperative procedure performed did not meet the inclusion criteria, for example not midline incision, conversion to open procedure using a non-midline incision, or emergency patients found not to have a tumour intra-operatively. We acknowledge that this method may increase the risk of selection bias into the trial, however to overcome this we have collected information on the reasons why patients were not randomised after consenting (**Figure 3**).

The setting of the feasibility trial was chosen as the trial's lead site; a high volume teaching hospital. This poses a potential limitation for the main trial at lower volume centres, in terms of ability to recruit participants over the time-period (3 years). However, the sample size required for the pilot and main trial is 800 across roughly 20 sites, which equates to 40 participants required per site and should be achievable over the trial time-period, even for lower volume centres, particularly given the incidence of colorectal cancer within the UK.

The HART trial is a pragmatic trial and as such we are allowing the control (mass closure) arm to be the responsible consultant surgeon's standard closure technique. We acknowledge that this may introduce a degree of variability in the control arm, but in order to counter this our sample size for the main trial has been powered to be able to stratify for site and surgeon.

1  
2  
3  
4  
5  
6  
7  
8  
9  
10  
11  
12  
13  
14  
15  
16  
17  
18  
19  
20  
21  
22  
23  
24  
25  
26  
27  
28  
29  
30  
31  
32  
33  
34  
35  
36  
37  
38  
39  
40  
41  
42  
43  
44  
45  
46  
47  
48  
49  
50  
51  
52  
53  
54  
55  
56  
57  
58  
59  
60

The serious adverse event rate and wound related complications were similar between both arms and reassuringly there were no suspected unexpected serious adverse reactions reported. It is anticipated that reporting on the full trial will take place in 2019.

For peer review only



**List of abbreviations**

AAA: Abdominal aortic aneurysm

BMI: Body Mass Index

CONTINT: CONTinuous versus INTerrupted abdominal wall closure after emergency midline laparotomy

COPD: Chronic Obstructive Pulmonary Disease

CT: Computed tomography

DMC: Data Monitoring Committee

HART: Hughes Abdominal Repair Trial

IQR: interquartile range

NIHR: National Institute of Health Research

PDS: polydioxanone

SAEs: Serious Adverse Events

SSI: Surgical Site Infection

STITCH: Suture Techniques to reduce the Incidence of The inCisional Hernia (RCT)

**Competing Interests**

There are no competing interests to declare

**Authors Contributions**

RLH, JC, DB, BR, ITR, JT conceived, designed and drafted the initial protocol

JH aided in redrafting and revising the protocol and contributed heavily to completion of the feasibility trial and pilot stages

SI, AW, NB, ITR have written and designed the analysis plan and revised the protocol

JC, DB, ITR and JT led the team that acquired the funding

RLH wrote the first draft of the manuscript

All authors agree to be accountable for all aspects of the work. All authors read and approved the final manuscript.

## References

1. Bosanquet D, Ansell J, Abdelrahman T, Cornish J, Harries R, Stimpson A, Davies L, Glasbey J, Frewer K, Frewer N, Russell D, Russell I, Torkington J. Systematic Review and Meta-Regression of factors affecting midline incisional hernia rates: Analysis of 14,618 patients. *PLoS ONE* 2015;10(9): e0138745.
2. Pereira JA, Pera M, Grande L. [Incidence of incisional hernia after open and laparoscopic colorectal cancer resection]. *Cir Esp.* 2013;91(1):44-9.
3. van Ramshorst GH, Eker HH, Hop WC, Jeekel J, Lange JF. Impact of incisional hernia on health-related quality of life and body image: a prospective cohort study. *Am J Surg*, 2012;204(2):144-50.
4. Diener MK, Voss S, Jensen K, Büchler MW, Seiler CM. Elective midline laparotomy closure: the INLINE systematic review and meta-analysis. *Ann Surg*, 2010; 251(5):843-56.
5. van 't Riet M, Steyerberg EW, Nellensteyn J, Bonjer HJ, Jeekel J. Meta-analysis of techniques for closure of midline abdominal incisions. *Br J Surg*, 2002;89(11):1350-6.
6. Sajid MS, Parampalli U, Baig MK, McFall MR. A systematic review on the effectiveness of slowly-absorbable versus non-absorbable sutures for abdominal fascial closure following laparotomy. *Int J Surg*, 2011; 9(8):615-25.
7. Deerenberg EB, Harlaar JJ, Steyerberg EW, Lont HE, van Doorn HC, Heisterkamp J, Wijnhoven BP, Schouten WR, Cense HA, Stockmann HB, Berends FJ, Dijkhuizen FP, Dwarkasing RS, Jairam AP, van Ramshorst GH, Kleinrensink GJ, Jeekel J, Lange JF. Small bites versus large bites for closure of abdominal midline incisions (STITCH): a double-blind, multicentre, randomised controlled trial. *Lancet.* 2015, 386(10000):1254-60.
8. Rahbari NN, Knebel P, Kieser M, Bruckner T, Bartsch DK, Friess H, Mihaljevic AL, Stern J, Diener MK, Voss S, Rossion I, Büchler MW, Seiler CM. Design and current status of CONTINT: continuous versus interrupted abdominal wall closure after emergency midline laparotomy - a randomized controlled multicenter trial [NCT00544583]. *Trials*, 2012;13:72.

1  
2  
3 9. Muysoms FE, Antoniou SA, Bury K, Campanelli G, Conze J, Cuccurullo D, Beaux AC,  
4 Deerenberg EB, East B, Fortelny RH, Gillion J, Henriksen NA, Israelsson L, Jairam A, Jänes A,  
5 Jeekel J, López-Cano M, Miserez M, Morales-Conde S, Sanders DL, Simons MP, Śmietański M,  
6 Venclauskas L, Berrevoet F; European Hernia Society. European Hernia Society guidelines on  
7 the closure of abdominal wall incisions. *Hernia* 2015;19:1–24.  
8  
9

10  
11  
12 10. Hughes BR & Webster D. Leslie Ernest Hughes OBITUARY. *BMJ*, 2011. 343.  
13

14  
15 11. Shukla VK, Gupta A, Singh H, Pandey M, Gautam A. Cardiff repair of incisional hernia: a  
16 university hospital experience. *Eur J Surg*, 1998;164(4):271-4.  
17

18  
19 12. Mudge M, Harding KG, Hughes LE. Incisional hernia. *Br J Surg*, 1986;73(1): 82.  
20

21  
22 13. Godara R, Garg P, Shankar G. Comparative evaluation of Cardiff repair and mesh plasty in  
23 incisional hernias. *Internet J Surg* [Internet]. 2007; 9 [about 8 p.].  
24

25  
26  
27 14. Malik R & Scott NA. Double near and far prolene suture closure: a technique for abdominal  
28 wall closure after laparostomy. *Br J Surg*, 2001;88(1):146-7.  
29

30  
31 15. Cornish J, Harries RL, Bosanquet D, Rees B, Ansell J, Frewer N, Dhruva Rao P, Parry C, Ellis-  
32 Owen R, Phillips SM, Morris C, Horwood J, Davies ML, Davies MM, Hargest R, Hilton J, Harris D,  
33 Ben-Sassi A, Rajagopal R, Hanratty D, Islam S, Watkins A, Bashir N, Jones S, Russell IR,  
34 Torkington J, on behalf of the HART Trial Management Group. Hughes Abdominal Repair Trial  
35 (HART) - Abdominal wall closure techniques to reduce the incidence of incisional hernias:  
36 Study protocol for a multi-centre pragmatic randomised controlled trial (ISRCTN 25616490).  
37 *Trials* 2016; 17(1):454.  
38  
39  
40  
41  
42  
43

44  
45 16. Russell D, Hoare ZSJ, Whitaker Rh, Whitaker CJ, Russell IT. Generalised method for  
46 adaptive randomisation in clinical trials. *Statistics in Medicine* 2011; 30: 922-34.  
47  
48  
49  
50  
51  
52  
53  
54  
55  
56  
57  
58  
59  
60

1  
2  
3  
4  
5  
6  
7  
8  
9  
10  
11  
12  
13  
14  
15  
16  
17  
18  
19  
20  
21  
22  
23  
24  
25  
26  
27  
28  
29  
30  
31  
32  
33  
34  
35  
36  
37  
38  
39  
40  
41  
42  
43  
44  
45  
46  
47  
48  
49  
50  
51  
52  
53  
54  
55  
56  
57  
58  
59  
60

For peer review only

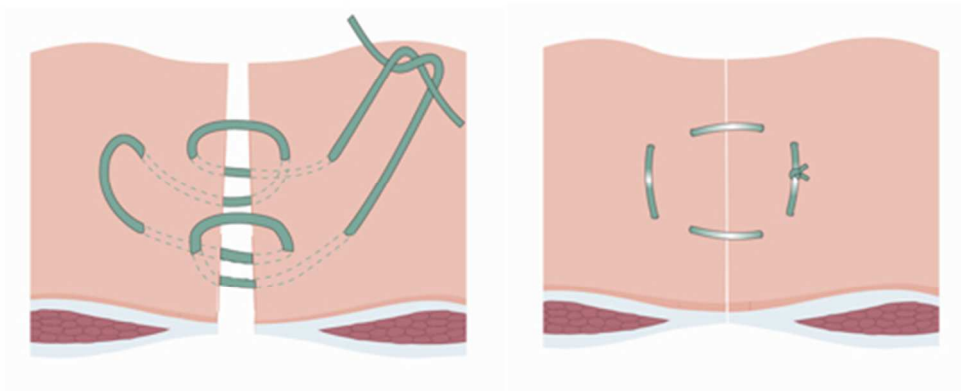

Figure 1. Diagram showing the Hughes closure method, using a combination of standard mass closure with a series of horizontal and two vertical mattress sutures within a single suture. When the sutures are pulled to close the defect, the sutures lie both across and along the incision.

191x79mm (72 x 72 DPI)

1  
2  
3  
4  
5  
6  
7  
8  
9  
10  
11  
12  
13  
14  
15  
16  
17  
18  
19  
20  
21  
22  
23  
24  
25  
26  
27  
28  
29  
30  
31  
32  
33  
34  
35  
36  
37  
38  
39  
40  
41  
42  
43  
44  
45  
46  
47  
48  
49  
50  
51  
52  
53  
54  
55  
56  
57  
58  
59  
60

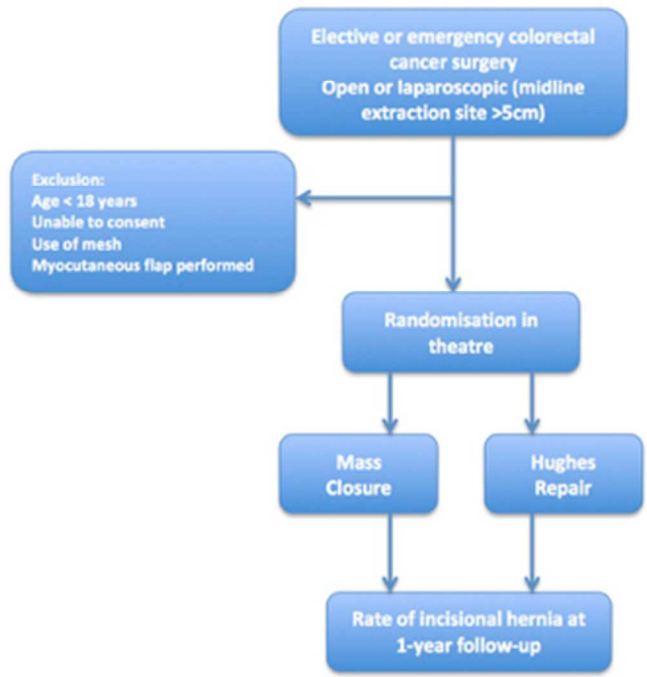

Figure 2. HART Study Design

180x132mm (72 x 72 DPI)

ew only

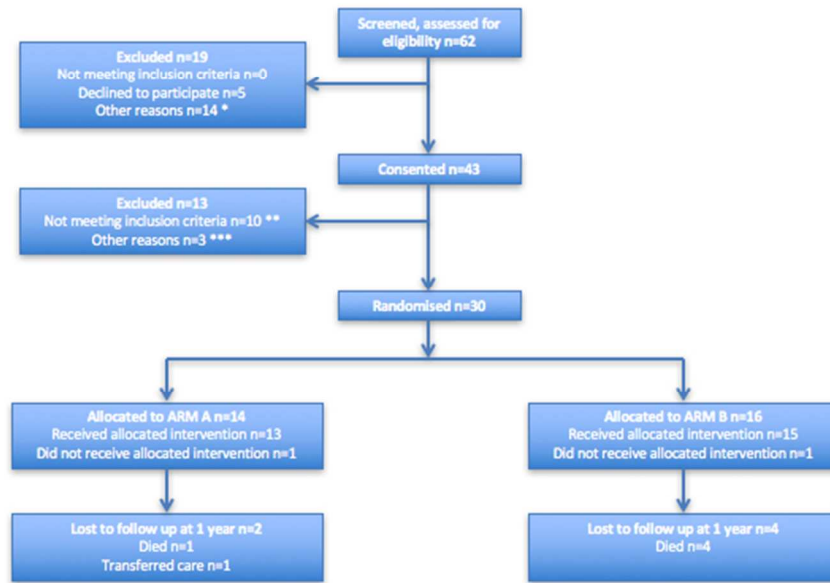

\* 9 patients not approached due to staff absence, 5 patients were screened but not included as feasibility study closed  
 \*\* 9 patients did not have midline incision >5cm, 1 patient did not have cancer  
 \*\*\* 1 patient was missed in theatre, 2 patients changed their mind before surgery

Figure 3. CONSORT diagram!! +

222x164mm (72 x 72 DPI)

View only

1  
2  
3  
4  
5  
6  
7  
8  
9  
10  
11  
12  
13  
14  
15  
16  
17  
18  
19  
20  
21  
22  
23  
24  
25  
26  
27  
28  
29  
30  
31  
32  
33  
34  
35  
36  
37  
38  
39  
40  
41  
42  
43  
44  
45  
46  
47  
48  
49

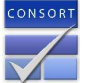

# CONSORT 2010 checklist of information to include when reporting a randomised trial\*

| Section/Topic                    | Item No | Checklist item                                                                                                                                                                              | Reported on page No |
|----------------------------------|---------|---------------------------------------------------------------------------------------------------------------------------------------------------------------------------------------------|---------------------|
| <b>Title and abstract</b>        |         |                                                                                                                                                                                             |                     |
|                                  | 1a      | Identification as a randomised trial in the title                                                                                                                                           | 1                   |
|                                  | 1b      | Structured summary of trial design, methods, results, and conclusions (for specific guidance see CONSORT for abstracts)                                                                     | 2                   |
| <b>Introduction</b>              |         |                                                                                                                                                                                             |                     |
| Background and objectives        | 2a      | Scientific background and explanation of rationale                                                                                                                                          | 4-5                 |
|                                  | 2b      | Specific objectives or hypotheses                                                                                                                                                           | 4-6                 |
| <b>Methods</b>                   |         |                                                                                                                                                                                             |                     |
| Trial design                     | 3a      | Description of trial design (such as parallel, factorial) including allocation ratio                                                                                                        | 6                   |
|                                  | 3b      | Important changes to methods after trial commencement (such as eligibility criteria), with reasons                                                                                          | n/a                 |
| Participants                     | 4a      | Eligibility criteria for participants                                                                                                                                                       | 6-7                 |
|                                  | 4b      | Settings and locations where the data were collected                                                                                                                                        | 6-7                 |
| Interventions                    | 5       | The interventions for each group with sufficient details to allow replication, including how and when they were actually administered                                                       | 7-8                 |
| Outcomes                         | 6a      | Completely defined pre-specified primary and secondary outcome measures, including how and when they were assessed                                                                          | n/a                 |
|                                  | 6b      | Any changes to trial outcomes after the trial commenced, with reasons                                                                                                                       | n/a                 |
| Sample size                      | 7a      | How sample size was determined                                                                                                                                                              | 8                   |
|                                  | 7b      | When applicable, explanation of any interim analyses and stopping guidelines                                                                                                                | n/a                 |
| <b>Randomisation:</b>            |         |                                                                                                                                                                                             |                     |
| Sequence generation              | 8a      | Method used to generate the random allocation sequence                                                                                                                                      | 7                   |
|                                  | 8b      | Type of randomisation; details of any restriction (such as blocking and block size)                                                                                                         | 7                   |
| Allocation concealment mechanism | 9       | Mechanism used to implement the random allocation sequence (such as sequentially numbered containers), describing any steps taken to conceal the sequence until interventions were assigned | 7                   |
| Implementation                   | 10      | Who generated the random allocation sequence, who enrolled participants, and who assigned participants to interventions                                                                     | 7                   |
| Blinding                         | 11a     | If done, who was blinded after assignment to interventions (for example, participants, care providers, those                                                                                | 7                   |



|                                                      |     |                                                                                                                                                   |     |
|------------------------------------------------------|-----|---------------------------------------------------------------------------------------------------------------------------------------------------|-----|
|                                                      |     | assessing outcomes) and how                                                                                                                       |     |
|                                                      | 11b | If relevant, description of the similarity of interventions                                                                                       |     |
| Statistical methods                                  | 12a | Statistical methods used to compare groups for primary and secondary outcomes                                                                     | n/a |
|                                                      | 12b | Methods for additional analyses, such as subgroup analyses and adjusted analyses                                                                  | n/a |
| <b>Results</b>                                       |     |                                                                                                                                                   |     |
| Participant flow (a diagram is strongly recommended) | 13a | For each group, the numbers of participants who were randomly assigned, received intended treatment, and were analysed for the primary outcome    | 9   |
|                                                      | 13b | For each group, losses and exclusions after randomisation, together with reasons                                                                  | 9   |
| Recruitment                                          | 14a | Dates defining the periods of recruitment and follow-up                                                                                           | 9   |
|                                                      | 14b | Why the trial ended or was stopped                                                                                                                | 9   |
| Baseline data                                        | 15  | A table showing baseline demographic and clinical characteristics for each group                                                                  | 14  |
| Numbers analysed                                     | 16  | For each group, number of participants (denominator) included in each analysis and whether the analysis was by original assigned groups           | 9   |
| Outcomes and estimation                              | 17a | For each primary and secondary outcome, results for each group, and the estimated effect size and its precision (such as 95% confidence interval) | n/a |
|                                                      | 17b | For binary outcomes, presentation of both absolute and relative effect sizes is recommended                                                       | n/a |
| Ancillary analyses                                   | 18  | Results of any other analyses performed, including subgroup analyses and adjusted analyses, distinguishing pre-specified from exploratory         | n/a |
| Harms                                                | 19  | All important harms or unintended effects in each group (for specific guidance see CONSORT for harms)                                             | n/a |
| <b>Discussion</b>                                    |     |                                                                                                                                                   |     |
| Limitations                                          | 20  | Trial limitations, addressing sources of potential bias, imprecision, and, if relevant, multiplicity of analyses                                  | 10  |
| Generalisability                                     | 21  | Generalisability (external validity, applicability) of the trial findings                                                                         | 10  |
| Interpretation                                       | 22  | Interpretation consistent with results, balancing benefits and harms, and considering other relevant evidence                                     | 10  |
| <b>Other information</b>                             |     |                                                                                                                                                   |     |
| Registration                                         | 23  | Registration number and name of trial registry                                                                                                    | 1   |
| Protocol                                             | 24  | Where the full trial protocol can be accessed, if available                                                                                       | 6   |
| Funding                                              | 25  | Sources of funding and other support (such as supply of drugs), role of funders                                                                   | 8   |

\*We strongly recommend reading this statement in conjunction with the CONSORT 2010 Explanation and Elaboration for important clarifications on all the items. If relevant, we also recommend reading CONSORT extensions for cluster randomised trials, non-inferiority and equivalence trials, non-pharmacological treatments, herbal interventions, and pragmatic trials. Additional extensions are forthcoming: for those and for up to date references relevant to this checklist, see [www.consort-statement.org](http://www.consort-statement.org).

# BMJ Open

## Hughes Abdominal Repair Trial (HART) - Abdominal wall closure techniques to reduce the incidence of incisional hernias: Feasibility trial for a multi-centre pragmatic randomised controlled trial



|                                 |                                                                                                                                                                                                                                                                                                                                                                                                                                                                                                                                                                                                                                                                                                                                                                                                             |
|---------------------------------|-------------------------------------------------------------------------------------------------------------------------------------------------------------------------------------------------------------------------------------------------------------------------------------------------------------------------------------------------------------------------------------------------------------------------------------------------------------------------------------------------------------------------------------------------------------------------------------------------------------------------------------------------------------------------------------------------------------------------------------------------------------------------------------------------------------|
| Journal:                        | <i>BMJ Open</i>                                                                                                                                                                                                                                                                                                                                                                                                                                                                                                                                                                                                                                                                                                                                                                                             |
| Manuscript ID                   | bmjopen-2017-017235.R2                                                                                                                                                                                                                                                                                                                                                                                                                                                                                                                                                                                                                                                                                                                                                                                      |
| Article Type:                   | Research                                                                                                                                                                                                                                                                                                                                                                                                                                                                                                                                                                                                                                                                                                                                                                                                    |
| Date Submitted by the Author:   | 16-Sep-2017                                                                                                                                                                                                                                                                                                                                                                                                                                                                                                                                                                                                                                                                                                                                                                                                 |
| Complete List of Authors:       | Harries, Rhiannon; University Hospital of Wales, Department of Colorectal Surgery; Welsh Barbers Research Group<br>Cornish, Julie; Welsh Barbers Research Group; Royal Glamorgan Hospital, Department of Colorectal Surgery<br>Bosanquet, David; University Hospital of Wales, Department of Colorectal Surgery; Welsh Barbers Research Group<br>Rees, Buddug; University Hospital of Wales, Department of Colorectal Surgery<br>Horwood, James; University Hospital of Wales, Department of Colorectal Surgery<br>Islam, Saiful; Swansea University, Trials Unit<br>Bashir, Nadim; Swansea University, Trials Unit<br>Watkins, Alan; Swansea University, Trials Unit<br>Russell, Ian; Swansea University, Trials Unit<br>Torkington, Jared; University Hospital of Wales, Department of Colorectal Surgery |
| <b>Primary Subject Heading</b>: | Surgery                                                                                                                                                                                                                                                                                                                                                                                                                                                                                                                                                                                                                                                                                                                                                                                                     |
| Secondary Subject Heading:      | Evidence based practice                                                                                                                                                                                                                                                                                                                                                                                                                                                                                                                                                                                                                                                                                                                                                                                     |
| Keywords:                       | incisional hernia, abdominal closure, hughes repair, mass closure, randomised controlled trial, colorectal cancer                                                                                                                                                                                                                                                                                                                                                                                                                                                                                                                                                                                                                                                                                           |
|                                 |                                                                                                                                                                                                                                                                                                                                                                                                                                                                                                                                                                                                                                                                                                                                                                                                             |

SCHOLARONE™  
Manuscripts

1  
2  
3 **Hughes Abdominal Repair Trial (HART) - Abdominal wall closure techniques to**  
4 **reduce the incidence of incisional hernias: Feasibility trial for a multi-centre**  
5 **pragmatic randomised controlled trial (ISRCTN 25616490)**  
6  
7  
8

9  
10 Harries RL<sup>1,2</sup>, Cornish J<sup>2,3</sup>, Bosanquet D<sup>1,2</sup>, Rees B<sup>1</sup>, Horwood J<sup>1</sup>, Islam S<sup>4</sup>, Bashir N<sup>4</sup>, Watkins A<sup>4</sup>,  
11 Russell IT<sup>4</sup>, Torkington J<sup>1</sup>; on behalf of the HART Trial Management Group  
12

13  
14 1 University Hospital of Wales, Cardiff

15 2 Welsh Barbers Research Group

16 3 Royal Glamorgan Hospital, Llantrisant

17 4 Swansea Trials Unit, Swansea University  
18  
19  
20  
21  
22

23 **Correspondence should be addressed to:**

24  
25 Prof Jared Torkington, Dep. of Surgery, University Hospital of Wales, Heath Park, Cardiff CF14 4XW  
26 [jared.torkington@wales.nhs.uk](mailto:jared.torkington@wales.nhs.uk) Tel: +44 2920 747747  
27  
28  
29  
30  
31  
32

33 **Word count:** 2240

34  
35 **Article type:** Randomised controlled trial  
36  
37

38 **Running title:** Hughes Abdominal Repair Trial: Feasibility trial  
39  
40

41 **Conflict of interest:** None declared  
42  
43

44 **Keywords:** Incisional hernia; Abdominal closure; Hughes repair; Mass closure; randomised  
45 controlled trial; colorectal cancer  
46  
47  
48  
49  
50  
51  
52  
53  
54  
55  
56  
57  
58  
59  
60

## Abstract

**Objectives:** Incisional hernias are common complications of midline abdominal closure. The 'Hughes Repair' combines a standard mass closure with a series of horizontal and two vertical mattress sutures within a single suture. There is evidence to suggest this technique is as effective as mesh repair for the operative management of incisional hernias; however, no trials have compared Hughes Repair with standard mass closure for the prevention of incisional hernia formation. This paper aims to test the feasibility of running a randomised controlled trial of a comparison of abdominal wall closure methods following midline incisional surgery for colorectal cancer, in preparation to a definitive randomised controlled trial.

**Design and Setting:** A feasibility trial (with 1:1 randomisation) conducted perioperatively during colorectal cancer surgery.

**Participants:** Patients undergoing midline incisional surgery for resection of colorectal cancer.

**Interventions:** Comparison of two suture techniques (Hughes repair or standard mass closure) for the closure of the midline abdominal wound following surgery for colorectal cancer.

**Primary and Secondary Outcomes:** A 30-patient feasibility trial assessed recruitment, randomisation, deliverability and early safety of the surgical techniques used.

**Results:** A total of 30 patients were randomised from 43 patients recruited and consented, over a 5-month period. 14 and 16 patients were randomised to Arm A and B, respectively. There was 1 superficial surgical site infection (SSI) and 2 organ space SSI reported in arm A and 2 superficial SSI and 1 complete wound dehiscence in arm B. There were no suspected unexpected serious adverse reactions reported in either arm. Independent data monitoring committee found no early safety concerns.

**Conclusions:** The feasibility trial found no early safety concerns and demonstrated that the trial was acceptable to patients. Progression to the pilot and main phases of the trial has now commenced following approval by the independent data monitoring committee.

**Trial registration:** ISRCTN 25616490

## Strengths and Limitations of this study

- This feasibility trial is not powered for a definitive study and simply reports the recruitment, deliverability and safety
- We report blinded outcome data and have not included incisional hernia rates in order to prevent the introduction of bias or reduction of equipoise for future recruitment of the main trial
- We acknowledge that randomising immediately prior to abdominal closure may increase the risk of selection bias into the trial, however to overcome this we have collected information on the reasons why patients were not randomised after consenting in the screening log.
- The setting of the feasibility trial was chosen as the trial's lead site; a high volume teaching hospital. This poses a potential limitation for the main trial at lower volume centres, in terms of ability to recruit participants over the time-period (3 years).
- The HART trial is a pragmatic trial and as such we are allowing the control (mass closure) arm to be the responsible consultant surgeon's standard closure technique, and acknowledge that this may introduce a degree of variability in the control arm.

## Introduction

Incisional hernias are common complications of midline abdominal incisions, with a reported incidence of 12.8% at 2 years follow-up in a systematic review of 14,618 patients [1]. Within patients who have undergone colorectal cancer resectional surgery, the rate of incisional hernia has been reported as high as 39.9%, including both open and laparoscopic approaches (40.9% and 37.1%, respectively) [2]. They can result in significant morbidity, impaired quality of life [3] and frequently require emergency surgery. Despite recent development in mesh technology, incisional hernia repair still has disappointingly high recurrence rates (up to 54% in suture repair and up to 36% in mesh repair [4-5]). Prevention of the development of incisional hernia therefore brings significant benefits for both patients and healthcare provision funding.

'Mass closure' remains the standard technique for abdominal closure (closing all layers of the abdominal wall, excluding the skin), with either non-absorbable or slow-resorbing sutures, such as polydioxanone (PDS) [6]. A systematic review and meta-regression of over 14,000 patients found no difference in incisional hernia rate comparing suture material [1]. This poses the question as to whether improved suture technique may reduce incisional hernia formation. The STITCH trial [7], a Dutch multicentre, randomised controlled trial compared small stitch continuous sutures with large stitch standard mass closure in 560 patients. Results demonstrated a reduction in the rate of incisional hernia from 21% in the large bite group to 13% in the small bite group at one-year follow-up. The CONTINT trial, currently still in recruitment, is comparing continuous with interrupted sutures in closing midline incisions after emergency laparotomy [8].

The European Hernia Society Guidance on the closure of abdominal wall incisions (2015) recommended the use of prophylactic mesh augmentation for an elective midline laparotomy in a high-risk patient in order to reduce the risk of incisional hernia [9]. However, firstly, they determined that the evidence base for this was weak and secondly, in the UK mesh augmentation closure is infrequently used. It is for these reasons that it is still critical for other closure methods to be rigorously assessed for their role in incisional hernia prevention.

The eponymously titled 'Hughes Repair' (Professor Les Hughes, 1932-2011 [10]), also known as the 'far-and-near' or 'Cardiff Repair' [11] combines a standard mass closure (two loop 1 PDS sutures) with a series of horizontal and two vertical mattress sutures within a single suture (1

1  
2  
3 Nylon); theoretically distributing the load along the incision length as well as across it (**Figure**

4  
5 **1).** The principles are:

- 6  
7  
8  
9  
10  
11  
12  
13  
14
1. To ensure, by palpation, that only sound normal tissues are used for the repair
  2. To use graduated tension for easy approximation
  3. Use a monofilament Nylon suture, which has the advantage of slipping easily through tissues to create a pulley system [12].

15  
16  
17  
18  
19  
20  
21  
22  
23  
24  
25  
26  
27  
28  
29  
30  
31  
32  
33  
34  
35  
36  
37  
38  
39  
40  
41  
42  
43  
44  
45  
46  
47  
48  
49  
50  
51  
52  
53  
54  
55  
56  
57  
58  
59  
60

The Hughes Repair has been shown to have outcomes as effective as the standard mesh repair in incisional hernia repairs [13]. It is also used for closing abdomens when patients are at high risk of incisional hernias, after complete abdominal wound dehiscence and laparostomy [14].

This feasibility trial aimed to establish whether a randomised controlled trial to compare Hughes Repair with standard mass closure for prevention of midline incisional hernia, in patients undergoing colorectal cancer resectional surgery, would be deemed acceptable to patients, achieve adequate recruitment and result in no early safety concerns.

## Methods/Design

### Study Design

The HART trial hypothesis is that the Hughes Repair will reduce the incidence of clinically detected incisional hernia at one year in patients undergoing midline abdominal wall closure incisions following elective or emergency colorectal cancer surgery when compared with standard mass closure **Figure 2**. This is a 1:1 randomised controlled trial comparing two suture techniques for the closure of the midline abdominal wound following surgery for colorectal cancer. The study was approved by the Wales Research Ethics Committee (MREC 12/WA/0374).

### Setting and location

The feasibility trial took place at the trial's lead site University Hospital of Wales, Cardiff; a high-volume teaching hospital (1 of the 20 proposed recruitment sites for the main trial).

### Aims and outcome measures

The feasibility trial aimed to assess the ability of the trial to recruit and consent patients over a 5-month period and the deliverability and safety of the Hughes Repair. The acceptability was assessed in terms of percentage of consenting versus refusing participants. Adequacy of recruitment is assessed in terms of number of recruited participants. Operation specific adverse events collected included surgical site infection and full wound dehiscence. Early surgical safety was assessed in terms of serious event and wound complication rates. In this paper we report blinded outcome data and have not included incisional hernia rates in order to prevent the introduction of bias or reduction of equipoise for future recruitment of the main trial.

Independent data monitoring committee reviewed the un-blinded safety data after completion of the feasibility phase. The outcome measures for the full trial have been previously reported [15]; Primary outcome measure being the rate of incisional hernia at 1-year follow-up assessed by clinical examination. The full trial protocol can be accessed via the following link: <https://njl-admin.nihr.ac.uk/document/download/2007245>. Follow-up will continue for 5 years post-operatively, however in this paper, only 12-month lost to follow-up



1  
2  
3 data will be presented as the aim of this feasibility trial is to assess the deliverability and safety  
4 of the trial.  
5

### 6 7 **Eligibility Criteria** 8

9  
10 Eligibility criteria were assessed at two time points; at initial screening and at point of surgical  
11 closure /randomisation. Adult patients (aged 18 year or over), able to give informed consent,  
12 undergoing either elective colorectal cancer surgery following full staging investigations  
13 including an abdominal CT scan or emergency surgery in those with a strong suspicion of  
14 colorectal cancer on abdominal CT scan were eligible at point of initial screening. All patients  
15 had to be suitable for either Hughes repair or standard mass closure. At point of surgical  
16 closure, eligibility was further assessed, and all patients who had a midline incision (open or  
17 laparoscopic assisted/ converted) of 5cm or more in length were deemed suitable for  
18 randomisation. Patients requiring mesh insertion or having an abdominal musculofascial flap  
19 for closure of the perineal defect in abdomino-perineal wound closure were excluded.  
20  
21  
22  
23  
24  
25  
26  
27

### 28 **Consent** 29

30  
31 Patients were identified, approached and provided with a patient information leaflet. Consent  
32 for trial participation, was gained by either consultant surgeons or surgical registrars who had  
33 current 'Good Clinical Practice' certification.  
34  
35  
36  
37

### 38 **Randomisation and Data Collection** 39

40 An adaptive randomisation design was used to allocate eligible patients to groups of similar  
41 size; This randomisation is based on an independent, computer-based sequence, generated  
42 from an implementation of the dynamic algorithm, using operation category (elective or  
43 emergency) and surgeon as stratifying variables [16]. Patients were randomised in a 1:1 ratio  
44 to either Mass closure or Hughes Repair. Randomisation took place during surgery and as  
45 close as possible to the time when the surgeon commenced closure. During the feasibility trial,  
46 a telephone randomisation system was used. The patient was blinded to the treatment  
47 allocation assigned to them. Data management was supported by the Swansea Trials Unit.  
48  
49  
50  
51  
52  
53  
54

### 55 **Surgical Quality Assurance** 56 57 58 59 60

1  
2  
3 To assure the quality of the repair techniques, all surgeons participating in the trial  
4 (consultants and registrars) completed training and quality assessment on the Hughes Repair.  
5 All participating surgeons were assessed by the Chief Investigator and were approved only  
6 when closure technique was satisfactory. A reference instructional video was provided to  
7 participating surgeons. To monitor the training of professionals contributing to HART, a log  
8 was maintained with details of training, both surgical and in research governance notably  
9 'Good Clinical Practice'. For the purposes of this pragmatic study, mass closure was taken to  
10 be the responsible consultant surgeon's standard closure technique.  
11  
12  
13  
14  
15  
16

### 17 **Radiological Evaluation of incisional hernia**

18  
19  
20 A dedicated trial radiologist determined whether there was a hernia present on the 1-year  
21 colorectal cancer surveillance CT scan. They defined an incisional hernia as herniation of the  
22 bowel or other intra-abdominal content outside the abdominal wall, and also identified the  
23 presence of other hernias and the quality of the recti muscle. All scans were performed using  
24 the standard departmental protocol for follow-up scans.  
25  
26  
27  
28  
29

### 30 **Sample size**

31  
32  
33 The feasibility trial aimed to recruit a total of 30 patients over a 5-month period, because the  
34 HART trial management group felt that such a sample size was indicative of the ability to  
35 recruit the sample proposed for the main trial within the established time frame. The sample  
36 size for the main study has been published previously [14].  
37  
38  
39  
40

### 41 **Funding**

42  
43  
44 The NIHR Health Technology Assessment programme requested this feasibility trial as a  
45 prerequisite for awarding grant 12/35/29 for the pilot and main phases of HART.  
46  
47

### 48 **Adverse events**

49  
50  
51 An adverse event (AE) was defined as any untoward medical occurrence in a clinical trial  
52 participant to whom a study intervention has been administered and which does not  
53 necessarily have a causal relationship with this treatment. An AE can therefore be any  
54 unfavourable and unintended sign (including abnormal laboratory finding), symptom or  
55 disease. The following listed AEs that are considered expected for patients undergoing  
56  
57  
58  
59  
60

1  
2  
3 colorectal surgery: lower respiratory tract infection, urinary tract infection, anastomotic  
4 leak, intra-abdominal sepsis, deep vein thrombosis, pulmonary embolus, wound infection,  
5 surgical site infection, wound breakdown, paralytic ileus, bleeding, myocardial infarction, and  
6 stoma complications (prolapsed, retraction, dehiscence or hernia). However, if these events  
7 lead to death, that would be considered unexpected. These events may be classified as serious  
8 and will be recorded as such but will not require reporting to Research Ethics Committee.  
9 Additional information may be requested for adverse events of special interest such as wound  
10 breakdown and surgical site infections.  
11  
12

13  
14  
15  
16  
17  
18 A serious adverse event (SAE) is an adverse event which results in any of the following: death,  
19 was life-threatening, required hospitalization or prolongation of existing hospitalization,  
20 persistent or significant disability or incapacity, consists of a congenital anomaly or birth  
21 defect, or is otherwise considered medically significant by the investigator.  
22  
23  
24

#### 25 26 **Statistical analysis**

27  
28  
29 A two-tailed fisher's exact test was used to compare SAE rate between both arms. Differences  
30 were considered to be statistically significant at  $p \leq 0.05$ .  
31  
32  
33  
34  
35  
36  
37  
38  
39  
40  
41  
42  
43  
44  
45  
46  
47  
48  
49  
50  
51  
52  
53  
54  
55  
56  
57  
58  
59  
60

## Results

### Recruitment and randomisation

A total of 62 patients were screened and assessed for eligibility for entry into the trial over a 5-month time period, October 2013 to February 2014. (**Figure 3**). Of those screened, 43 patients consented to entry into the trial (69%). A total of 30 of the 43 patients were randomised in the operating theatre (14 patients were randomised to arm A and 16 patients were randomised to arm B). The reasons for exclusion are described in the CONSORT diagram (**Figure 3**).

For the 30 patients who were randomised, the median age was 74 years (IQR 66-78). There were 23 males and 7 females. Demographical data is presented in **Table 1**.

**Table 1. Patient demographics and clinical characteristics**

|                                               | Arm A<br>(N=14) | Arm B<br>(N=16) | Total<br>(N=30) |
|-----------------------------------------------|-----------------|-----------------|-----------------|
| Gender                                        |                 |                 |                 |
| Male                                          | 10 (71%)        | 13 (81%)        | 23 (77%)        |
| Female                                        | 4 (29%)         | 3 (19%)         | 7 (23%)         |
| Median Age<br>(IQR)                           | 75<br>(61-78)   | 73<br>(68- 77)  | 74<br>(66-78)   |
| Mean BMI<br>(Min-Max)                         | 30<br>(22-49)   | 29<br>(18-42)   | 29<br>(18-49)   |
| Smoker                                        | 1 (7%)          | 3 (19%)         | 4 (13%)         |
| Steroid/ immunosuppression use                | 0 (0%)          | 0 (0%)          | 0 (0%)          |
| Diabetes                                      | 5 (36%)         | 4 (25%)         | 9 (30%)         |
| Connective tissue disorder                    | 1 (7%)          | 0 (0%)          | 1 (3%)          |
| COPD                                          | 1 (7%)          | 2 (13%)         | 3 (10%)         |
| AAA (known or previous repair)                | 0 (0%)          | 0 (0%)          | 0 (0%)          |
| Previous abdominal surgery                    | 8 (57%)         | 8 (50%)         | 15 (50%)        |
| Neoadjuvant chemotherapy                      | 1 (7%)          | 0 (0%)          | 1 (3%)          |
| Neoadjuvant radiotherapy                      | 1 (7%)          | 1 (6%)          | 2 (7%)          |
| Incisional Hernia present pre-operatively     | 0 (0%)          | 1 (6%)          | 1 (3%)          |
| Previous incisional hernia repair             | 1 (7%)          | 0 (0%)          | 1 (3%)          |
| Non incisional hernia present pre-operatively | 0 (0%)          | 3 (19%)         | 3 (10%)         |
| Mode of surgery                               |                 |                 |                 |
| Laparoscopic                                  | 4 (27%)         | 6 (38%)         | 10 (33%)        |
| Laparoscopic converted                        | 7 (50%)         | 3 (19%)         | 10 (33%)        |
| Open                                          | 3 (21%)         | 7 (44%)         | 10 (33%)        |

In arm A, one patient had died prior to 12-month follow-up and a further patient had transferred care to another unit. In arm B, one patient had died prior to 12-month follow-up.

### Safety data

There were a total of 16 serious adverse events reported in 10 patients (**Table 2**);

**Table 2. Reported serious adverse events**

|                                     | Arm A     | Arm B    |
|-------------------------------------|-----------|----------|
| Myocardial infarction               | 2         | 2        |
| Lower respiratory tract infection   | 2         | 1        |
| Pulmonary embolism                  | 1         | 0        |
| Renal failure                       | 0         | 1        |
| Anastomotic leak                    | 2         | 0        |
| Parastomal hernia                   | 0         | 1        |
| Superficial surgical site infection | 2         | 0        |
| Dehiscence                          | 0         | 1        |
| Death*                              | 1         | 0        |
| <b>Total SAEs</b>                   | <b>10</b> | <b>6</b> |
| <b>Total Patients affected</b>      | <b>5</b>  | <b>5</b> |

\* 1 SAE reported was reported as 'death', therefore it has had to be listed as an event of death. There were two other SAEs that resulted in death within the feasibility study

serious adverse event rate was 34% in arm A and 31% in arm B ( $p=1.0000$ ). There were no suspected unexpected serious adverse reactions reported in either arm. With regard to wound related complications, there was 1 superficial surgical site infection and 2 organ space surgical site infections reported in arm A and 2 superficial surgical site infections and 1 complete wound dehiscence requiring a return to theatre in arm B (**Table 3**).

**Table 3. Wound related complications**

|                                          | <b>Arm A</b> | <b>Arm B</b> |
|------------------------------------------|--------------|--------------|
| Superficial SSI                          | 1            | 2            |
| Deep SSI                                 | 0            | 0            |
| Organ space SSI                          | 2            | 0            |
| Wound dehiscence                         | 0            | 1            |
| <b>Total wound related complications</b> | <b>3</b>     | <b>3</b>     |

The Data Monitoring Committee (DMC) reviewed the un-blinded adverse events data and identified no safety concerns.

## Discussion

The results of this feasibility trial demonstrated that a randomised controlled trial designed to compare two suture techniques for the prevention of midline incisional hernia, in patients undergoing cancer resectional surgery, was able to recruit 30 patients over 5 months, as planned. This suggests that the proposed sample size of 800 patients for the main full trial is achievable in the time scale with the proposed number of sites recruiting (approximately 20) [14].

The feasibility trial results established that the trial was acceptable to patients. Patient participation rates were high, demonstrated by 69% of all eligible patients consenting to participation in the trial. Nine patients were screened for eligibility but not consented due to staff shortages highlighting the importance of having adequate number of approved consenting staff on the delegation log. Due to the nature of the study it was accepted that not all patients consented would eventually be randomised. In fact, there was a higher than expected number of patients consented and not eventually randomised (31%). Patients were consented but not randomised if the intraoperative procedure performed did not meet the inclusion criteria, for example not midline incision, conversion to open procedure using a non-midline incision, or emergency patients found not to have a tumour intra-operatively. We acknowledge that this method may increase the risk of selection bias into the trial, however to overcome this we have collected information on the reasons why patients were not randomised after consenting (**Figure 3**).

The setting of the feasibility trial was chosen as the trial's lead site; a high volume teaching hospital. This poses a potential limitation for the main trial at lower volume centres, in terms of ability to recruit participants over the time-period (3 years). However, the sample size required for the pilot and main trial is 800 across roughly 20 sites, which equates to 40 participants required per site and should be achievable over the trial time-period, even for lower volume centres, particularly given the incidence of colorectal cancer within the UK.

The HART trial is a pragmatic trial and as such we are allowing the control (mass closure) arm to be the responsible consultant surgeon's standard closure technique. We acknowledge that this may introduce a degree of variability in the control arm, but in order to counter this our sample size for the main trial has been powered to be able to stratify for site and surgeon.



1  
2  
3  
4  
5  
6  
7  
8  
9  
10  
11  
12  
13  
14  
15  
16  
17  
18  
19  
20  
21  
22  
23  
24  
25  
26  
27  
28  
29  
30  
31  
32  
33  
34  
35  
36  
37  
38  
39  
40  
41  
42  
43  
44  
45  
46  
47  
48  
49  
50  
51  
52  
53  
54  
55  
56  
57  
58  
59  
60

The serious adverse event rate and wound related complications were similar between both arms and reassuringly there were no suspected unexpected serious adverse reactions reported. It is anticipated that reporting on the full trial will take place in 2019.

For peer review only

1  
2  
3 **Figure 1.** Diagram showing the Hughes closure method, using a combination of standard mass  
4 closure with a series of horizontal and two vertical mattress sutures within a single suture.  
5  
6 When the sutures are pulled to close the defect, the sutures lie both across and along the  
7  
8 incision.  
9

10  
11 **Figure 2.** HART Study Design  
12

13  
14  
15 **Figure 3.** CONSORT diagram  
16  
17  
18  
19

### 20 **List of abbreviations**

21  
22 AAA: Abdominal aortic aneurysm

23  
24 BMI: Body Mass Index

25  
26 CONTINT: CONTinuous versus INTerrupted abdominal wall closure after emergency midline  
27 laparotomy

28  
29 COPD: Chronic Obstructive Pulmonary Disease

30  
31 CT: Computed tomography

32  
33 DMC: Data Monitoring Committee

34  
35 HART: Hughes Abdominal Repair Trial

36  
37 IQR: interquartile range

38  
39 NIHR: National Institute of Health Research

40  
41 PDS: polydioxanone

42  
43 SAEs: Serious Adverse Events

44  
45 SSI: Surgical Site Infection

46  
47 STITCH: Suture Techniques to reduce the Incidence of The inCisional Hernia (RCT)  
48

### 49 **Competing Interests**

50  
51  
52 There are no competing interests to declare  
53  
54

### 55 **Authors Contributions**

56  
57  
58 RLH, JC, DB, BR, ITR, JT conceived, designed and drafted the initial protocol  
59  
60

JH aided in redrafting and revising the protocol and contributed heavily to completion of the feasibility trial and pilot stages

SI, AW, NB, ITR have written and designed the analysis plan and revised the protocol

JC, DB, ITR and JT led the team that acquired the funding

RLH wrote the first draft of the manuscript

All authors agree to be accountable for all aspects of the work. All authors read and approved the final manuscript.

## References

1. Bosanquet D, Ansell J, Abdelrahman T, Cornish J, Harries R, Stimpson A, Davies L, Glasbey J, Frewer K, Frewer N, Russell D, Russell I, Torkington J. Systematic Review and Meta-Regression of factors affecting midline incisional hernia rates: Analysis of 14,618 patients. *PLoS ONE* 2015;10(9): e0138745.
2. Pereira JA, Pera M, Grande L. [Incidence of incisional hernia after open and laparoscopic colorectal cancer resection]. *Cir Esp*. 2013;91(1):44-9.
3. van Ramshorst GH, Eker HH, Hop WC, Jeekel J, Lange JF. Impact of incisional hernia on health-related quality of life and body image: a prospective cohort study. *Am J Surg*, 2012;204(2):144-50.
4. Diener MK, Voss S, Jensen K, Büchler MW, Seiler CM. Elective midline laparotomy closure: the INLINE systematic review and meta-analysis. *Ann Surg*, 2010; 251(5):843-56.
5. van 't Riet M, Steyerberg EW, Nellensteyn J, Bonjer HJ, Jeekel J. Meta-analysis of techniques for closure of midline abdominal incisions. *Br J Surg*, 2002;89(11):1350-6.
6. Sajid MS, Parampalli U, Baig MK, McFall MR. A systematic review on the effectiveness of slowly-absorbable versus non-absorbable sutures for abdominal fascial closure following laparotomy. *Int J Surg*, 2011; 9(8):615-25.

- 1  
2  
3 7. Deerenberg EB, Harlaar JJ, Steyerberg EW, Lont HE, van Doorn HC, Heisterkamp J,  
4 Wijnhoven BP, Schouten WR, Cense HA, Stockmann HB, Berends FJ, Dijkhuizen FP, Dwarkasing  
5 RS, Jairam AP, van Ramshorst GH, Kleinrensink GJ, Jeekel J, Lange JF. Small bites versus large  
6 bites for closure of abdominal midline incisions (STITCH): a double-blind, multicentre,  
7 randomised controlled trial. *Lancet*. 2015, 386(10000):1254-60.
- 8  
9  
10  
11  
12 8. Rahbari NN, Knebel P, Kieser M, Bruckner T, Bartsch DK, Friess H, Mihaljevic AL, Stern J,  
13 Diener MK, Voss S, Rossion I, Büchler MW, Seiler CM. Design and current status of CONTINT:  
14 continuous versus interrupted abdominal wall closure after emergency midline laparotomy - a  
15 randomized controlled multicenter trial [NCT00544583]. *Trials*, 2012;13:72.
- 16  
17  
18  
19  
20 9. Muysoms FE, Antoniou SA, Bury K, Campanelli G, Conze J, Cuccurullo D, Beaux AC,  
21 Deerenberg EB, East B, Fortelny RH, Gillion J, Henriksen NA, Israelsson L, Jairam A, Jänes A,  
22 Jeekel J, López-Cano M, Miserez M, Morales-Conde S, Sanders DL, Simons MP, Śmietański M,  
23 Venclauskas L, Berrevoet F; European Hernia Society. European Hernia Society guidelines on  
24 the closure of abdominal wall incisions. *Hernia* 2015;19:1–24.
- 25  
26  
27  
28  
29  
30 10. Hughes BR & Webster D. Leslie Ernest Hughes OBITUARY. *BMJ*, 2011. 343.
- 31  
32  
33 11. Shukla VK, Gupta A, Singh H, Pandey M, Gautam A. Cardiff repair of incisional hernia: a  
34 university hospital experience. *Eur J Surg*, 1998;164(4):271-4.
- 35  
36  
37  
38 12. Mudge M, Harding KG, Hughes LE. Incisional hernia. *Br J Surg*, 1986;73(1): 82.
- 39  
40  
41 13. Godara R, Garg P, Shankar G. Comparative evaluation of Cardiff repair and mesh plasty in  
42 incisional hernias. *Internet J Surg* [Internet]. 2007; 9 [about 8 p.].
- 43  
44  
45 14. Malik R & Scott NA. Double near and far prolene suture closure: a technique for abdominal  
46 wall closure after laparostomy. *Br J Surg*, 2001;88(1):146-7.
- 47  
48  
49 15. Cornish J, Harries RL, Bosanquet D, Rees B, Ansell J, Frewer N, Dhruva Rao P, Parry C, Ellis-  
50 Owen R, Phillips SM, Morris C, Horwood J, Davies ML, Davies MM, Hargest R, Hilton J, Harris D,  
51 Ben-Sassi A, Rajagopal R, Hanratty D, Islam S, Watkins A, Bashir N, Jones S, Russell IR,  
52 Torkington J, on behalf of the HART Trial Management Group. Hughes Abdominal Repair Trial  
53 (HART) - Abdominal wall closure techniques to reduce the incidence of incisional hernias:  
54  
55  
56  
57  
58  
59  
60

1  
2  
3  
4  
5  
6  
7  
8  
9  
10  
11  
12  
13  
14  
15  
16  
17  
18  
19  
20  
21  
22  
23  
24  
25  
26  
27  
28  
29  
30  
31  
32  
33  
34  
35  
36  
37  
38  
39  
40  
41  
42  
43  
44  
45  
46  
47  
48  
49  
50  
51  
52  
53  
54  
55  
56  
57  
58  
59  
60

Study protocol for a multi-centre pragmatic randomised controlled trial (ISRCTN 25616490).  
Trials 2016; 17(1):454.

16. Russell D, Hoare ZSJ, Whitaker Rh, Whitaker CJ, Russell IT. Generalised method for  
adaptive randomisation in clinical trials. Statistics in Medicine 2011; 30: 922-34.

For peer review only

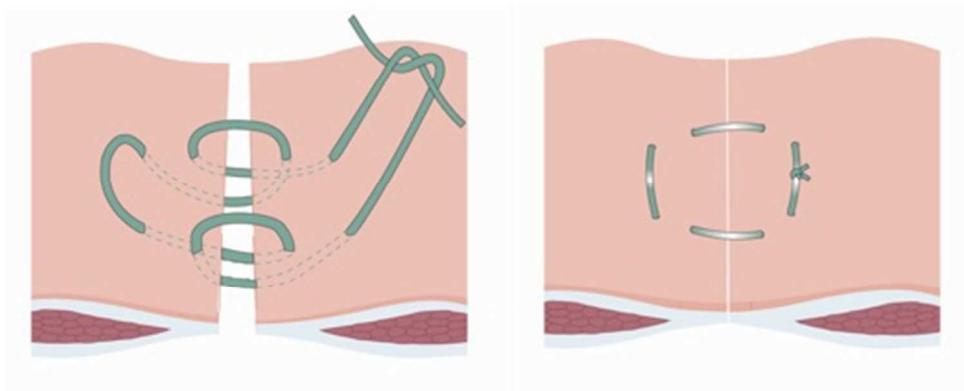

Figure 1. Diagram showing the Hughes closure method, using a combination of standard mass closure with a series of horizontal and two vertical mattress sutures within a single suture. When the sutures are pulled to close the defect, the sutures lie both across and along the incision.

45x19mm (300 x 300 DPI)

1  
2  
3  
4  
5  
6  
7  
8  
9  
10  
11  
12  
13  
14  
15  
16  
17  
18  
19  
20  
21  
22  
23  
24  
25  
26  
27  
28  
29  
30  
31  
32  
33  
34  
35  
36  
37  
38  
39  
40  
41  
42  
43  
44  
45  
46  
47  
48  
49  
50  
51  
52  
53  
54  
55  
56  
57  
58  
59  
60

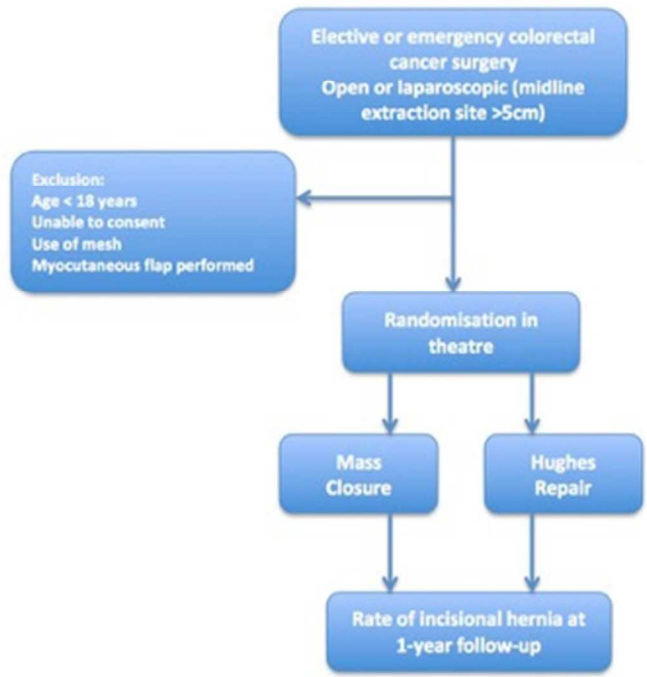

Figure 2. HART Study Design

43x31mm (300 x 300 DPI)

ew only

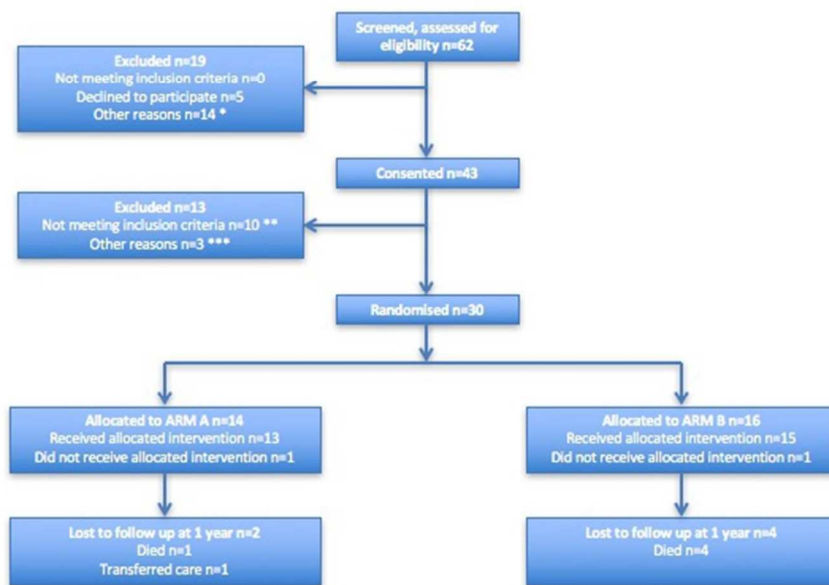

\* 9 patients not approached due to staff absence, 5 patients were screened but not included as feasibility study closed  
 \*\* 9 patients did not have midline incision >5cm, 1 patient did not have cancer  
 \*\*\* 1 patient was missed in theatre, 2 patients changed their mind before surgery

Figure 3. CONSORT diagram

53x39mm (300 x 300 DPI)

ew only



# CONSORT 2010 checklist of information to include when reporting a randomised trial\*

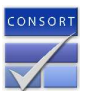

| Section/Topic                    | Item No | Checklist item                                                                                                                                                                              | Reported on page No |
|----------------------------------|---------|---------------------------------------------------------------------------------------------------------------------------------------------------------------------------------------------|---------------------|
| <b>Title and abstract</b>        |         |                                                                                                                                                                                             |                     |
|                                  | 1a      | Identification as a randomised trial in the title                                                                                                                                           | 1                   |
|                                  | 1b      | Structured summary of trial design, methods, results, and conclusions (for specific guidance see CONSORT for abstracts)                                                                     | 2                   |
| <b>Introduction</b>              |         |                                                                                                                                                                                             |                     |
| Background and objectives        | 2a      | Scientific background and explanation of rationale                                                                                                                                          | 4-5                 |
|                                  | 2b      | Specific objectives or hypotheses                                                                                                                                                           | 4-6                 |
| <b>Methods</b>                   |         |                                                                                                                                                                                             |                     |
| Trial design                     | 3a      | Description of trial design (such as parallel, factorial) including allocation ratio                                                                                                        | 6                   |
|                                  | 3b      | Important changes to methods after trial commencement (such as eligibility criteria), with reasons                                                                                          | n/a                 |
| Participants                     | 4a      | Eligibility criteria for participants                                                                                                                                                       | 6-7                 |
|                                  | 4b      | Settings and locations where the data were collected                                                                                                                                        | 6-7                 |
| Interventions                    | 5       | The interventions for each group with sufficient details to allow replication, including how and when they were actually administered                                                       | 7-8                 |
| Outcomes                         | 6a      | Completely defined pre-specified primary and secondary outcome measures, including how and when they were assessed                                                                          | n/a                 |
|                                  | 6b      | Any changes to trial outcomes after the trial commenced, with reasons                                                                                                                       | n/a                 |
| Sample size                      | 7a      | How sample size was determined                                                                                                                                                              | 8                   |
|                                  | 7b      | When applicable, explanation of any interim analyses and stopping guidelines                                                                                                                | n/a                 |
| <b>Randomisation:</b>            |         |                                                                                                                                                                                             |                     |
| Sequence generation              | 8a      | Method used to generate the random allocation sequence                                                                                                                                      | 7                   |
|                                  | 8b      | Type of randomisation; details of any restriction (such as blocking and block size)                                                                                                         | 7                   |
| Allocation concealment mechanism | 9       | Mechanism used to implement the random allocation sequence (such as sequentially numbered containers), describing any steps taken to conceal the sequence until interventions were assigned | 7                   |
| Implementation                   | 10      | Who generated the random allocation sequence, who enrolled participants, and who assigned participants to interventions                                                                     | 7                   |
| Blinding                         | 11a     | If done, who was blinded after assignment to interventions (for example, participants, care providers, those                                                                                | 7                   |

|                                                      |     |                                                                                                                                                   |     |
|------------------------------------------------------|-----|---------------------------------------------------------------------------------------------------------------------------------------------------|-----|
|                                                      |     | assessing outcomes) and how                                                                                                                       |     |
|                                                      | 11b | If relevant, description of the similarity of interventions                                                                                       |     |
| Statistical methods                                  | 12a | Statistical methods used to compare groups for primary and secondary outcomes                                                                     | n/a |
|                                                      | 12b | Methods for additional analyses, such as subgroup analyses and adjusted analyses                                                                  | n/a |
| <b>Results</b>                                       |     |                                                                                                                                                   |     |
| Participant flow (a diagram is strongly recommended) | 13a | For each group, the numbers of participants who were randomly assigned, received intended treatment, and were analysed for the primary outcome    | 9   |
|                                                      | 13b | For each group, losses and exclusions after randomisation, together with reasons                                                                  | 9   |
| Recruitment                                          | 14a | Dates defining the periods of recruitment and follow-up                                                                                           | 9   |
|                                                      | 14b | Why the trial ended or was stopped                                                                                                                | 9   |
| Baseline data                                        | 15  | A table showing baseline demographic and clinical characteristics for each group                                                                  | 14  |
| Numbers analysed                                     | 16  | For each group, number of participants (denominator) included in each analysis and whether the analysis was by original assigned groups           | 9   |
| Outcomes and estimation                              | 17a | For each primary and secondary outcome, results for each group, and the estimated effect size and its precision (such as 95% confidence interval) | n/a |
|                                                      | 17b | For binary outcomes, presentation of both absolute and relative effect sizes is recommended                                                       | n/a |
| Ancillary analyses                                   | 18  | Results of any other analyses performed, including subgroup analyses and adjusted analyses, distinguishing pre-specified from exploratory         | n/a |
| Harms                                                | 19  | All important harms or unintended effects in each group (for specific guidance see CONSORT for harms)                                             | n/a |
| <b>Discussion</b>                                    |     |                                                                                                                                                   |     |
| Limitations                                          | 20  | Trial limitations, addressing sources of potential bias, imprecision, and, if relevant, multiplicity of analyses                                  | 10  |
| Generalisability                                     | 21  | Generalisability (external validity, applicability) of the trial findings                                                                         | 10  |
| Interpretation                                       | 22  | Interpretation consistent with results, balancing benefits and harms, and considering other relevant evidence                                     | 10  |
| <b>Other information</b>                             |     |                                                                                                                                                   |     |
| Registration                                         | 23  | Registration number and name of trial registry                                                                                                    | 1   |
| Protocol                                             | 24  | Where the full trial protocol can be accessed, if available                                                                                       | 6   |
| Funding                                              | 25  | Sources of funding and other support (such as supply of drugs), role of funders                                                                   | 8   |

\*We strongly recommend reading this statement in conjunction with the CONSORT 2010 Explanation and Elaboration for important clarifications on all the items. If relevant, we also recommend reading CONSORT extensions for cluster randomised trials, non-inferiority and equivalence trials, non-pharmacological treatments, herbal interventions, and pragmatic trials. Additional extensions are forthcoming: for those and for up to date references relevant to this checklist, see [www.consort-statement.org](http://www.consort-statement.org).
